# Supplementary material
Source: publisher figshare collection journal article supplement (https://tandf.figshare.com/ndownloader/files/12865367)
Supplement: Supplementary file 1 [file 12865367]

Supporting Information for

**Pnicogen Bonds in Complexes with CO and CS:**

**Differentiating Properties**

Janet E. Del Bene‡, Ibon Alkorta,§ and José Elguero§

‡ Department of Chemistry, Youngstown State University, Youngstown, Ohio 44555 USA

§ Instituto de Química Médica (IQM-CSIC), Juan de la Cierva, 3, E-28006 Madrid, Spain

Pgs. S2-S3 Table S1. Structures (Å), total energies (a.u.) and molecular graphs for complexes OC:PH2X

Pgs. S4-S5 Table S2. Structures (Å), total energies (a.u.) and molecular graphs for complexes CO:PH2X

Pg. S6 Table S3. Angles (<, o) around pnicogen bonds in complexes OC:PH2Xand CO:PH2X

Pg. S7 Table S4. C-O and C-S stretching frequencies (cm–1) in OC:PH2X, CO:PH2X, and CS:PH2X complexes, and SC:PH2X complexes with traditional pnicogen bonds

Pg. S8 Table S5. Structures (Å), total energies (a.u.) and molecular graphs for complexes CS:PH2X

Pg. S9 Fig. S1. Binding energies and charge-transfer energies (kJ·mol–1) versus the P-C and P-S distances for complexes CS:PH2X

Pg. S10 Table S6. Structures (Å), total energies (a.u.) and molecular graphs for complexes SC:PH2X with phosphorus-shared pnicogen bonds

Pgs. S11-S12 Table S7. Structures (Å), total energies (a.u.) and molecular graphs for complexes SC:PH2X with traditional pnicogen bonds and SC:PH2(OH) transition structures

Pg. S13 Table S8. Electron density properties at intermolecular BCPs (au) in OC:PH2X and SC:PH2X complexes

Pg. S14 Fig. S2. Evolution of the electron density properties at intermolecular P-C BCPs of OC:PH2X and SC:PH2X as a function of the

P-C distance.

Pg. S15 Table S9. Components of spin-spin coupling constants 1pJ(P-C) (Hz) for SC:PH2X complexes with pnicogen-shared bonds, and 1J(P-C) (Hz) for H2PCS+

Table S1. Structures (Å), total energies (a.u.) and molecular graphs for complexes OC:PH2X

| 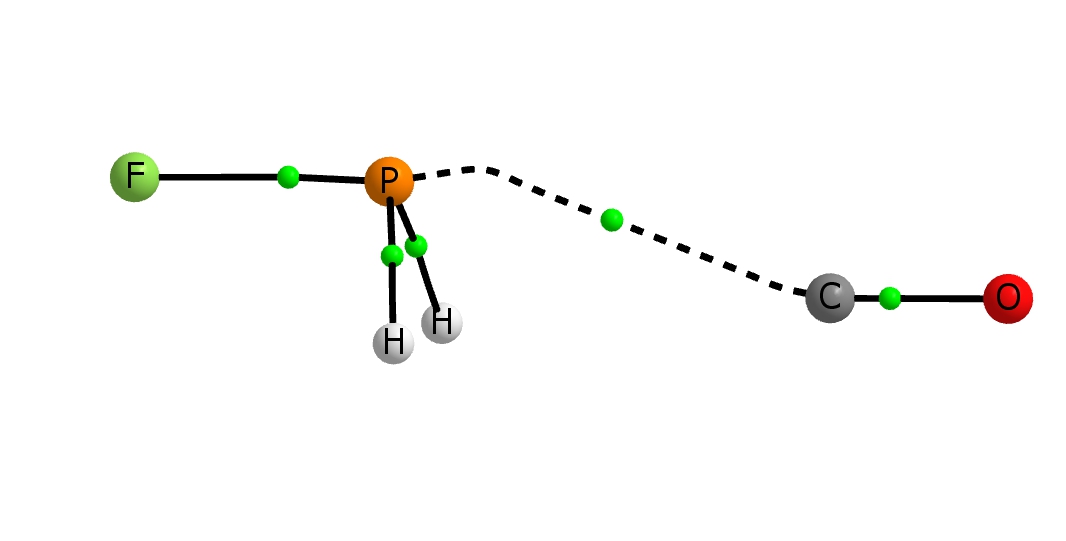 | oc:ph2f MP2= -554.97252094 NIMAG= 0  P,-0.1638134601,0.914175691,0.  H,0.7637668745,0.6088414689,1.0234925105  F,0.0354531587,2.5294220496,0.  H,0.7637668745,0.6088414689,-1.0234925105  C,0.1736230766,-1.9753453757,0.  O,0.0181936462,-3.1023825348,0. |
| --- | --- |
| 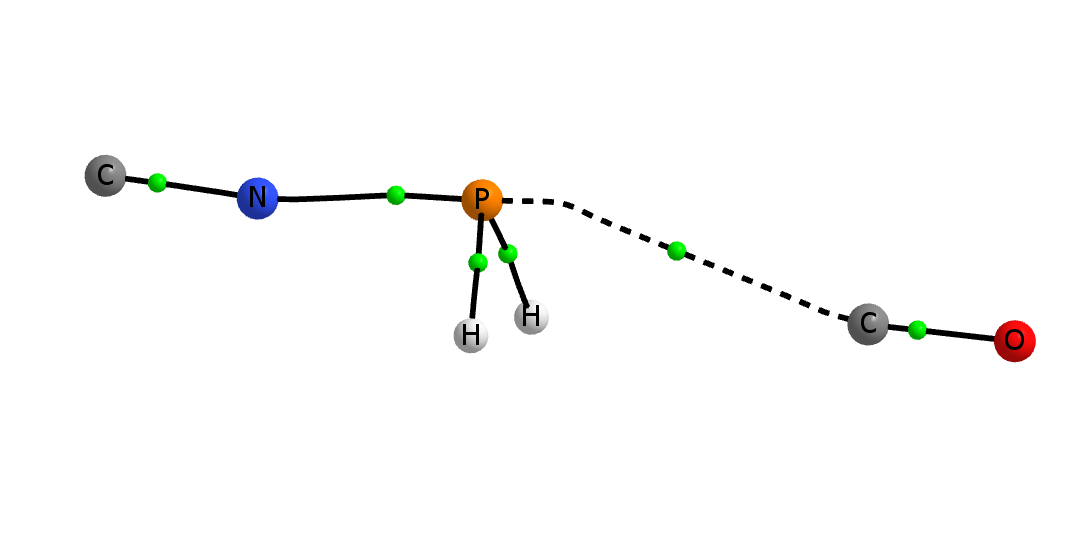 | oc:ph2nc MP2= -547.86437716 NIMAG= 0  P,-0.2122081974,-0.9117129903,0.  N,0.0973929482,-2.616979367,0.  H,0.6991185042,-0.6051787522,-1.0308975054  H,0.6991185042,-0.6051787522,1.0308975054  C,0.1562106355,2.1758754511,0.  O,0.0707539376,3.3100523173,0.  C,0.1472488369,-3.8006827137,0. |
| 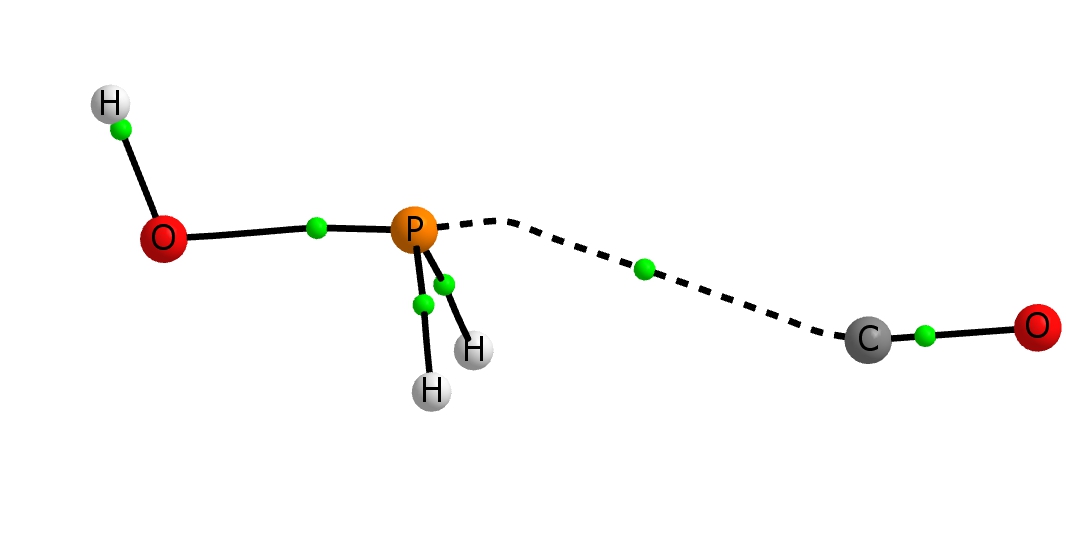 | oc:ph2oh (E) MP2= -530.95301209 NIMAG= 0  P,-0.1702241501,0.9917965878,0.  O,0.0826360986,2.6490925235,0.  H,0.7388428058,0.6457315506,1.0248789089  H,0.7388428058,0.6457315506,-1.0248789089  C,0.2112893847,-2.0954425607,0.  O,-0.0021247768,-3.213628875,0.  H,-0.7717459917,3.0913919035,0. |
| 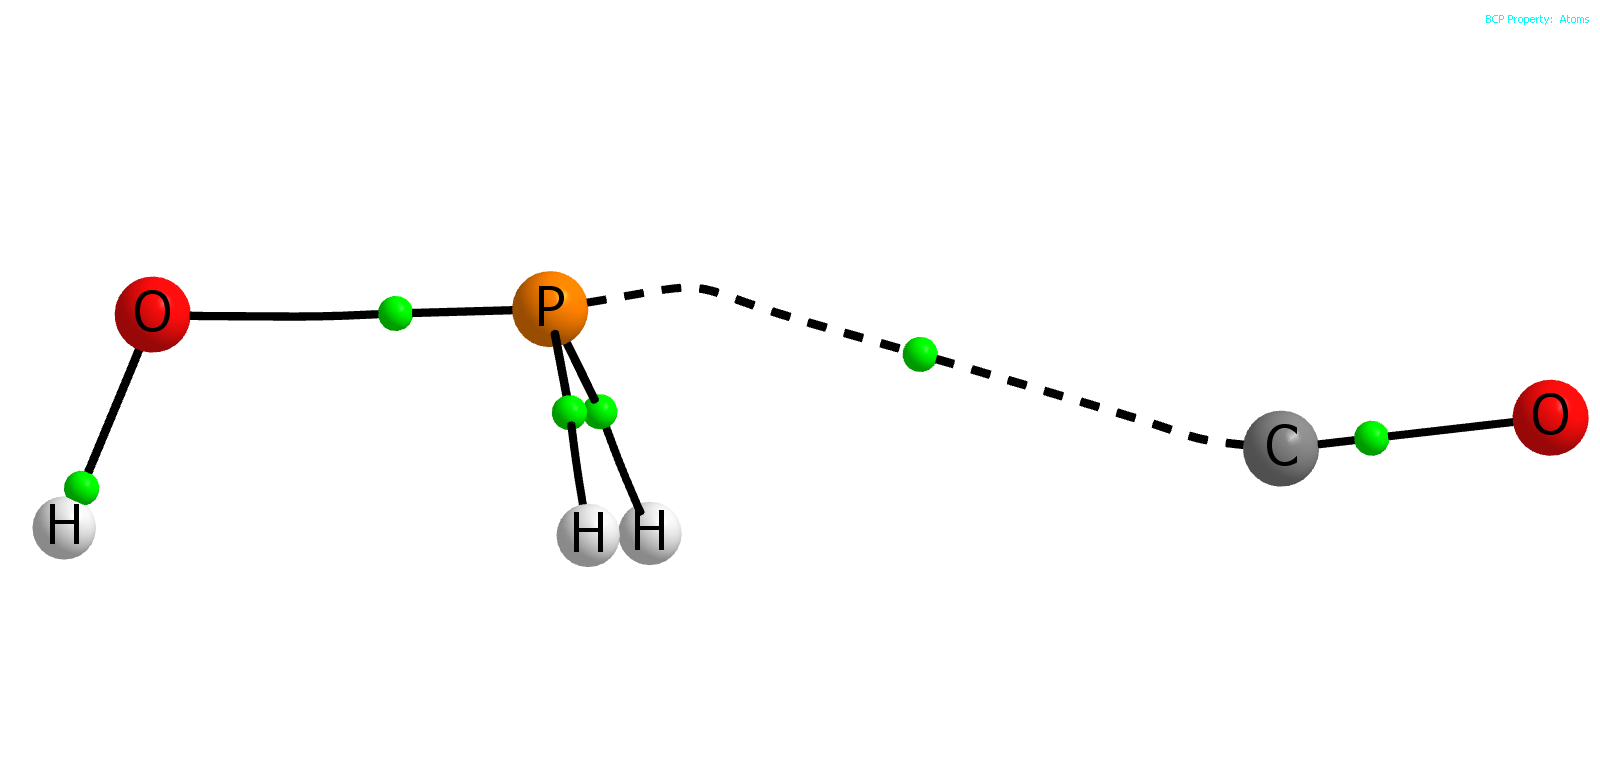 | oc:ph2oh (Z) MP2= -530.95250308 NIMAG= 0  P,-0.1665243338,0.9382256627,0.  O,0.0026663841,2.597668056,0.  H,0.7424900669,0.5684287232,1.0243315566  H,0.7424900669,0.5684287232,-1.0243315566  C,0.1422261031,-2.1672882035,0.  O,-0.0852447595,-3.2826571154,0.  H,0.9202546624,2.8899243738,0. |
| 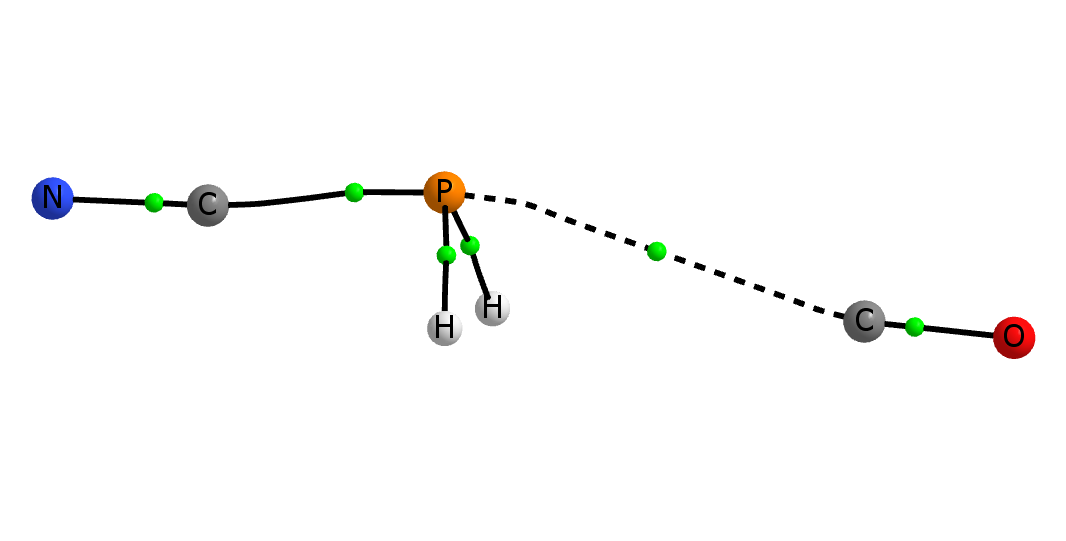 | oc:ph2cn MP2= -547.89371604 NIMAG= 0  P,-0.2692470217,-0.9574023337,0.  C,0.1086792578,-2.7108319713,0.  H,0.633714079,-0.6410959507,-1.0359241792  H,0.633714079,-0.6410959507,1.0359241792  C,0.1831927071,2.31840821,0.  O,0.1248658302,3.4548296369,0.  N,0.2417998682,-3.8781539033,0. |
| 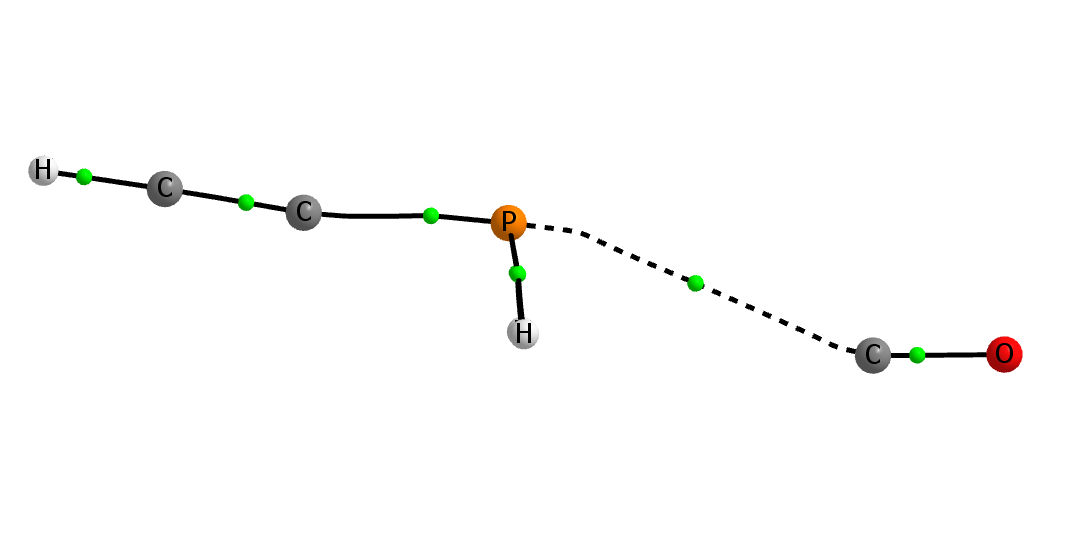 | oc:ph2cch MP2= -531.79614588 NIMAG= 0  P,-0.2032585156,-1.0028948198,0.  C,0.1283863483,-2.7492054318,0.  H,0.6931560728,-0.6578440134,-.0343976333  H,0.6931560728,-.6578440134,1.0343976333  C,0.1673955512,2.3357916611,0.  O,-0.1103138669,3.4399021852,0.  C,0.2126930096,-3.9673341736,0.  H,0.30772037,-5.0264940972,0. |
| 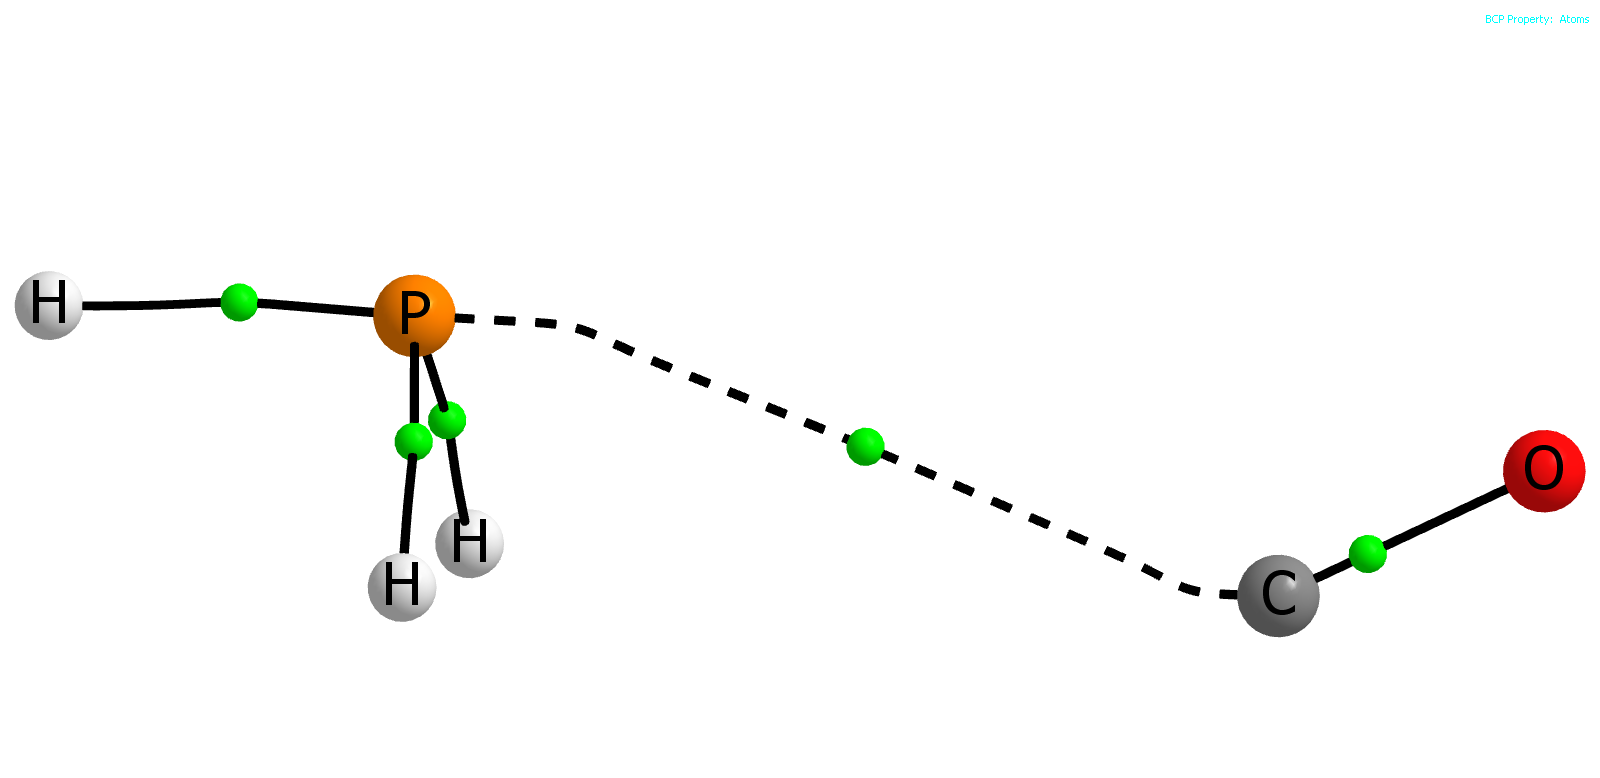 | oc:ph3 MP2= -455.80383944 NIMAG= 0  P,-0.1637489499,1.0742430099,0.  H,0.7766134242,0.8633730117,1.031335921  H,0.0017435943,2.477621433,0.  H,0.7766134242,0.8633730117,-1.031335921  C,0.4206853371,-2.3754577845,0.  O,-0.2039328298,-3.3277376817,0. |

Table S2. Structures (Å), total energies (a.u.) and molecular graphs for complexes CO:PH2X

| 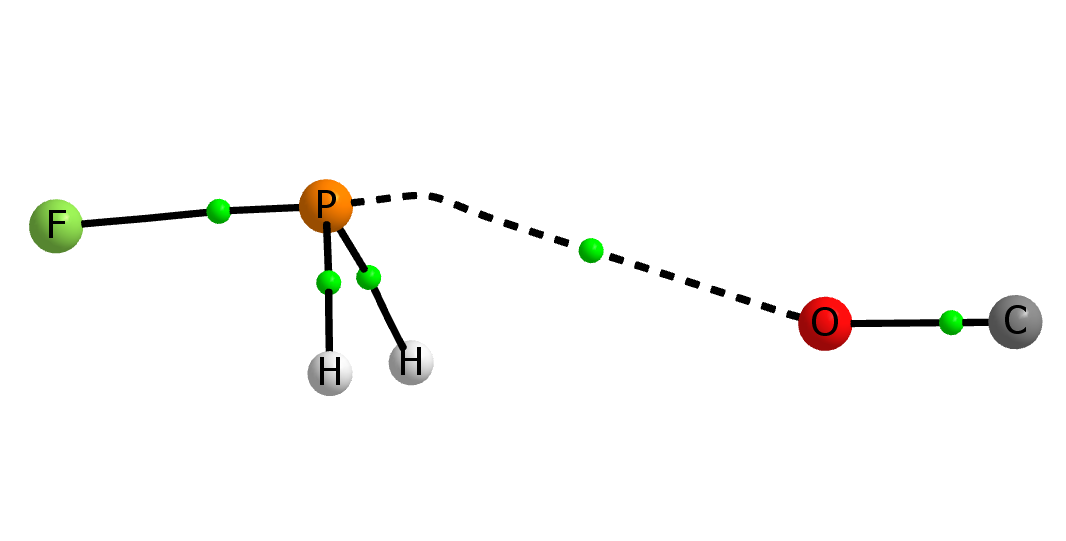 | co:ph2f MP2= -554.96981096 NIMAG= 0  P,-0.1868308765,0.9875452635,0.  H,0.7251971933,0.6289073962,1.0215913857  F,0.1010684713,2.5849879878,0.  H,0.7251971933,0.6289073962,-1.0215913857  O,0.1784438273,-2.0571530378,0.  C,0.0477633119,-3.189228378,0. |
| --- | --- |
| 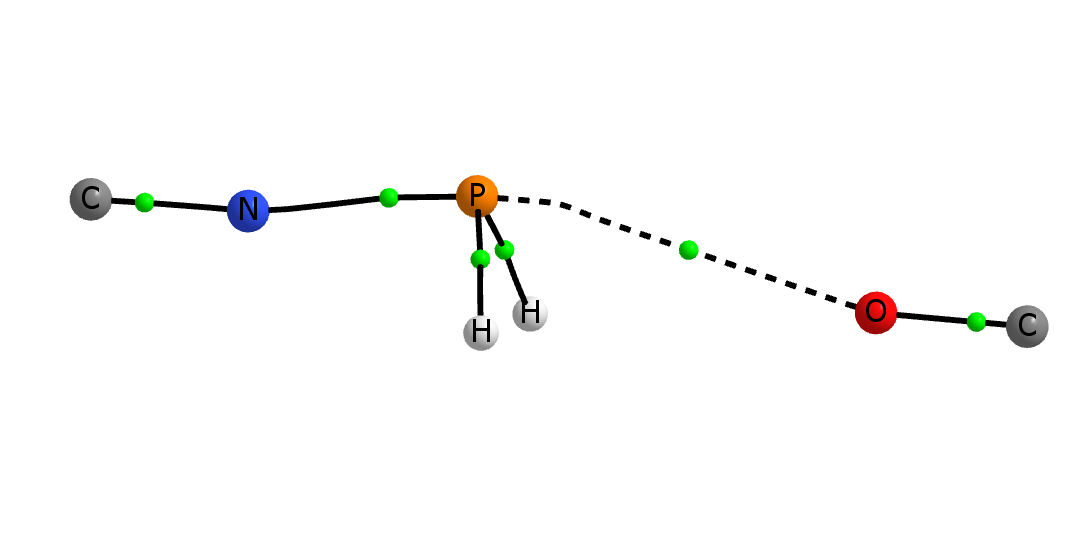 | co:ph2nc MP2= -547.86251404 NIMAG= 0  P,-0.2470010943,-0.9243231758,0.  N,0.1114492223,-2.6144173211,0.  H,0.6567601647,-0.5881255084,-1.0298412648  H,0.6567601647,-0.5881255084,1.0298412648  O,0.1736956823,2.1595562441,0.  C,0.1091872494,3.2977466808,0.  C,0.1967411326,-3.7963437978,0. |
| 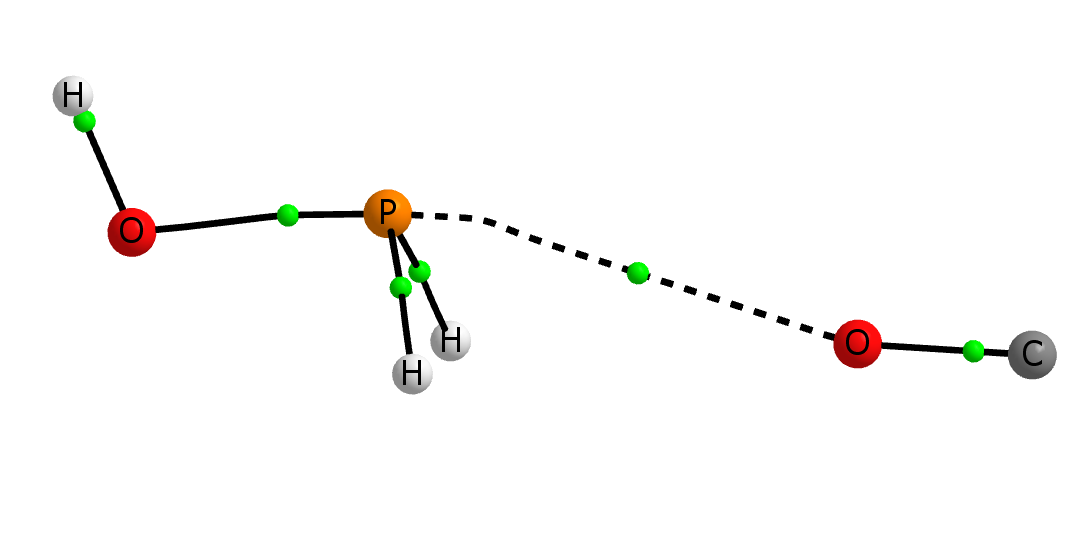 | co:ph2oh (E) MP2= -530.95148177 NIMAG= 0  P,-0.2242832554,1.023909521,0.  O,0.1286176393,2.6604523861,0.  H,0.6644650046,0.6231237778,1.0239207096  H,0.6644650046,0.6231237778,-1.0239207096  O,0.1897922512,-2.1167202545,0.  C,0.102091528,-3.2527199559,0.  H,-0.697631996,3.153503428,0. |
| 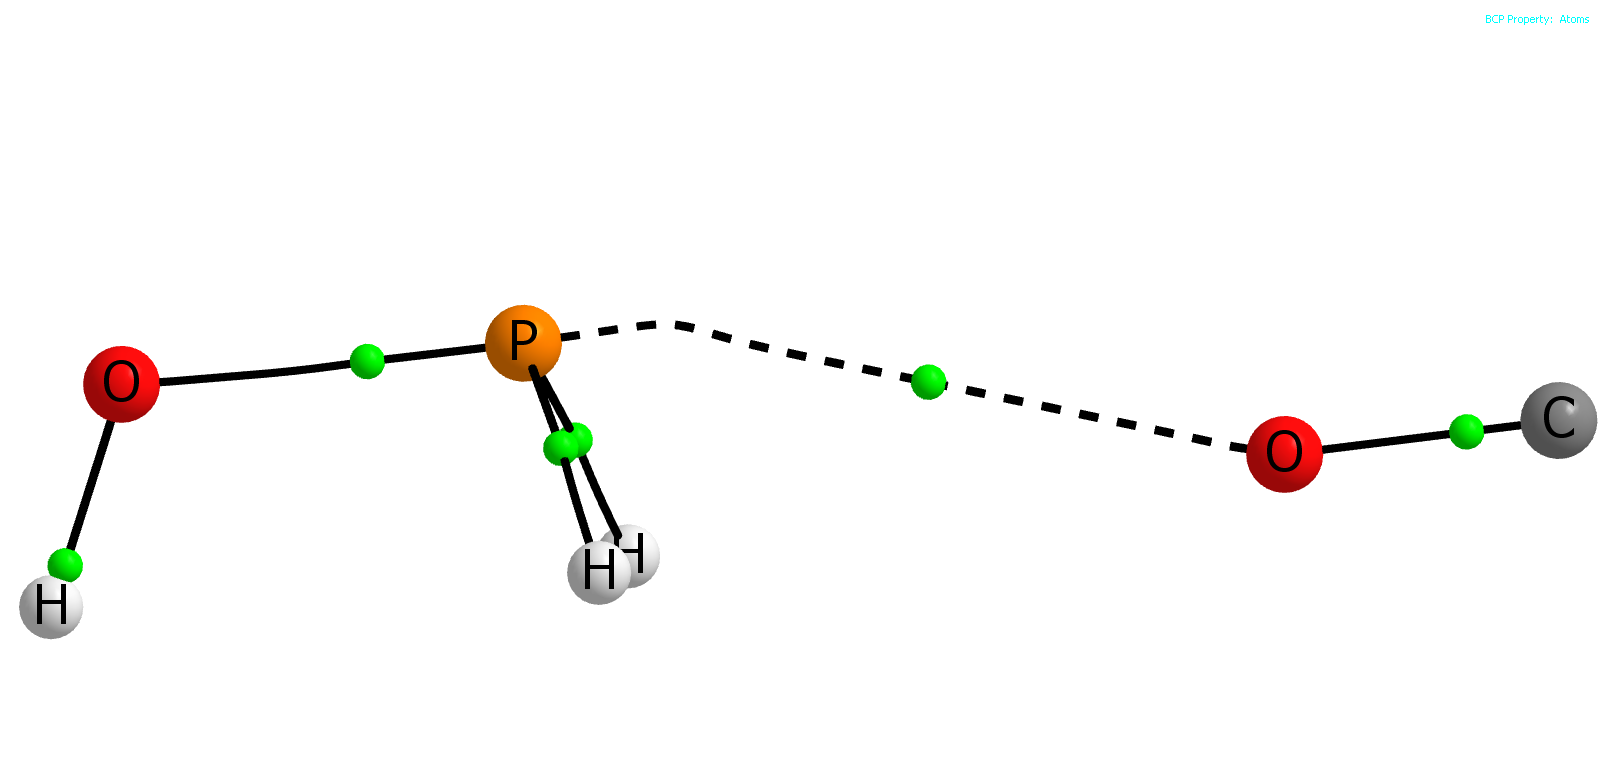 | co:ph2oh (Z) MP2= -530.95101554 NIMAG= 0  P,-0.1970956818,0.8986554262,0.  O,0.054429971,2.5453935105,0.  H,0.6948318216,0.4838104083,1.0232480607  H,0.6948318216,0.4838104083,-1.0232480607  O,0.1036275717,-2.2580852859,0.  C,-0.0921869023,-3.3805507138,0.  H,0.9854476881,2.7917032663,0. |
| 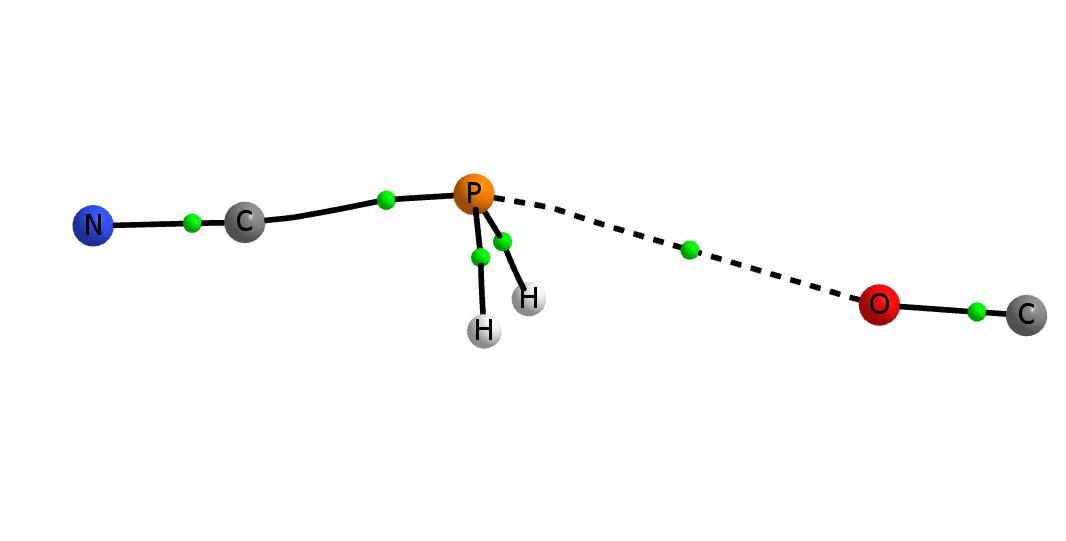 | co:ph2cn MP2= -547.89226226 NIMAG= 0  P,-0.2954608619,-0.9442734074,0.  C,0.1192465548,-2.6865435502,0.  H,0.6024720821,-0.6080635901,-1.0352183028  H,0.6024720821,-0.6080635901,1.0352183028  O,0.1990246591,2.2517616489,0.  C,0.1519951766,3.3904978042,0.  N,0.2769497192,-3.8505268522,0. |
| 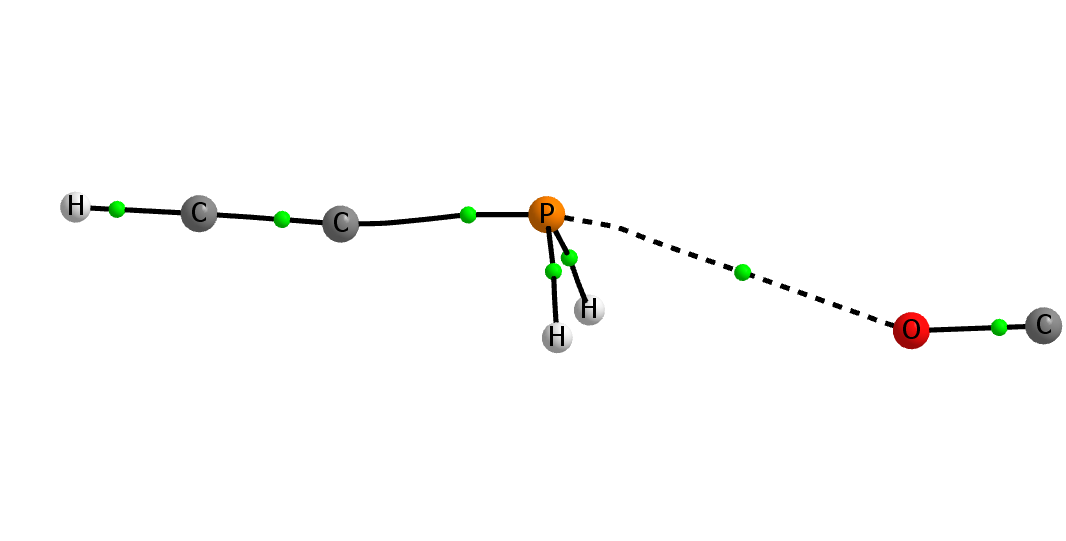 | co:ph2cch MP2= -531.79531315 NIMAG= 0  P,-0.2580445913,-0.9926147874,0.  C,0.1224157994,-2.7269442769,0.  H,0.6305529724,-0.6230878924,-1.0337960302  H,0.6305529724,-0.6230878924,1.0337960302  O,0.1954438889,2.2528000376,0.  C,-0.0383334294,3.3679800113,0.  C,0.2407926938,-3.9419243137,0.  H,0.3656870314,-4.998047063,0. |
| 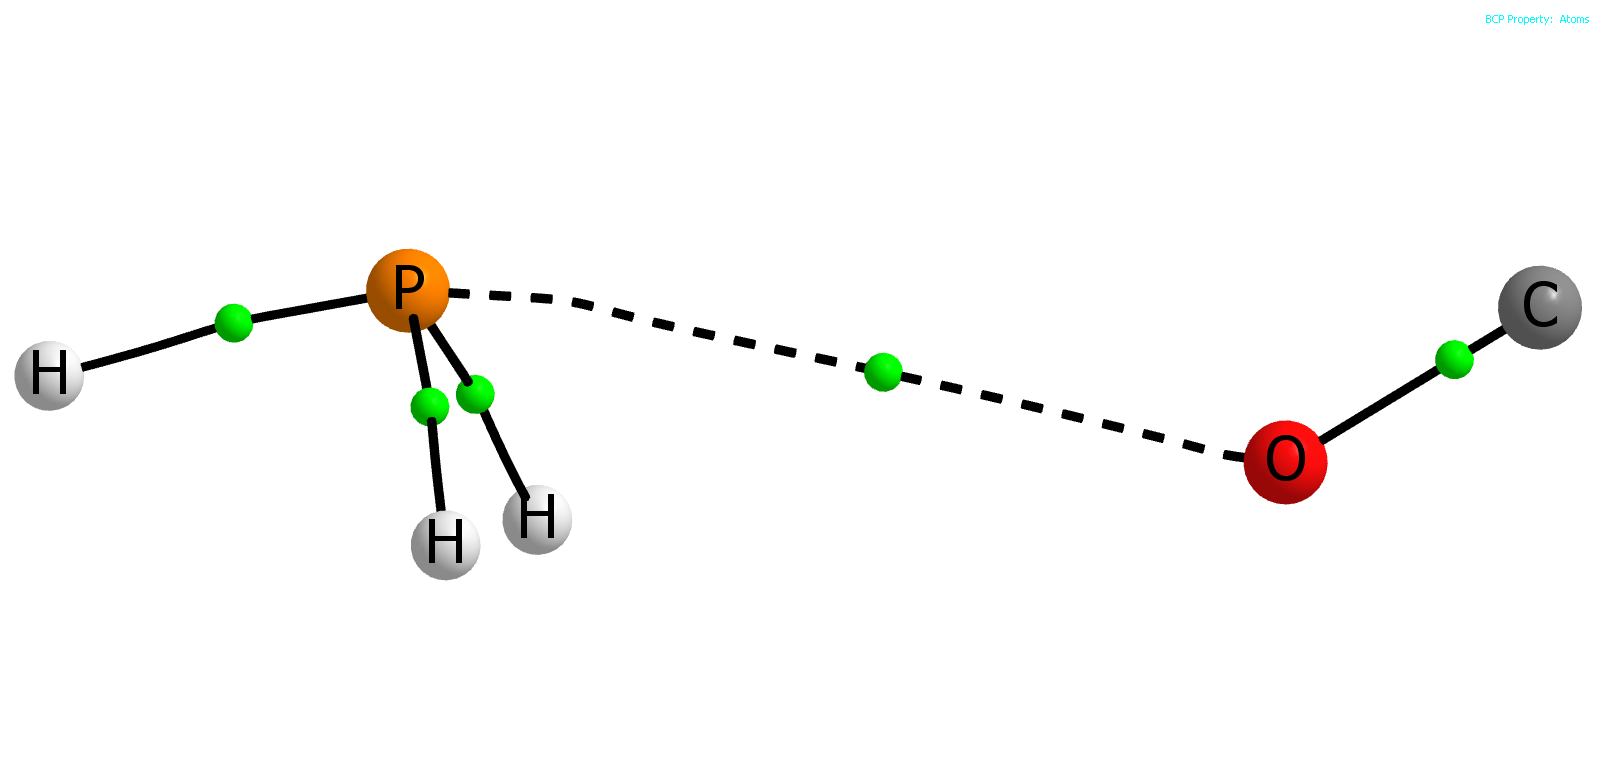 | oc:ph3 MP2= -455.80342556 NIMAG= 0  P,-0.2079789729,1.0847141329,0.  H,0.7052189019,0.7720908919,1.0307329847  H,0.1146255226,2.4597645969,0.  H,0.7052189019,0.7720908919,-1.0307329847  O,0.4379653069,-2.2678264118,0.  C,-0.1470756596,-3.2454191016,0. |

Table S3. Intermolecular angles (<, o) around pnicogen bonds in complexes OC:PH2Xand CO:PH2X

|  | OC:PH2X | | CO:PH2X | |
| --- | --- | --- | --- | --- |
| X = | <P-C-O | <A-P-Ca | <P-O-C | <A-P-Oa |
| F | 166 | 166 | 167 | 163 |
| NC | 169 | 163 | 169 | 160 |
| OH-*E* | 162 | 164 | 168 | 160 |
| OH-*Z* | 163 | 169 | 165 | 166 |
| CN | 169 | 160 | 169 | 158 |
| CCH | 160 | 163 | 160 | 160 |
| H | 137 | 164 | 138 | 156 |

a) A is the X atom directly bonded to P.

Table S4. C-O and C-S stretching frequencies (cm-1) in OC:PH2X, CO:PH2X, and CS:PH2X

complexes, and SC:PH2X complexes with traditional pnicogen bonds

|  | OC:PH2X | | CO:PH2X | | SC:PH2X  (traditional) | | CS:PH2X | |
| --- | --- | --- | --- | --- | --- | --- | --- | --- |
| X = | a |  |  |  | b |  |  |  |
| F | 2119 | 9 | 2107 | –3 |  |  | 1287 | –10 |
| NC | 2122 | 12 | 2103 | –6 | 1314 | 17 |  |  |
| OH-*E* | 2114 | 4 | 2107 | –2 | 1300 | 3 | 1289 | –8 |
| OH-*Z* | 2114 | 5 | 2107 | –3 | 1303 | 5 | 1289 | –8 |
| CN | 2117 | 8 | 2106 | –4 | 1308 | 11 |  |  |
| CCH | 2113 | 3 | 2107 | –3 | 1301 | 3 |  |  |
| H | 2110 | 1 | 2108 | –2 | 1298 | 1 | 1294 | –3 |

a The C-O stretching frequency of the isolated CO molecule is 2110 cm–1.

b The C-S stretching frequency of the isolated CS molecule is 1297 cm–1.

Table S5. Structures (Å), total energies (a.u.) and molecular graphs for complexes CS:PH2X

| 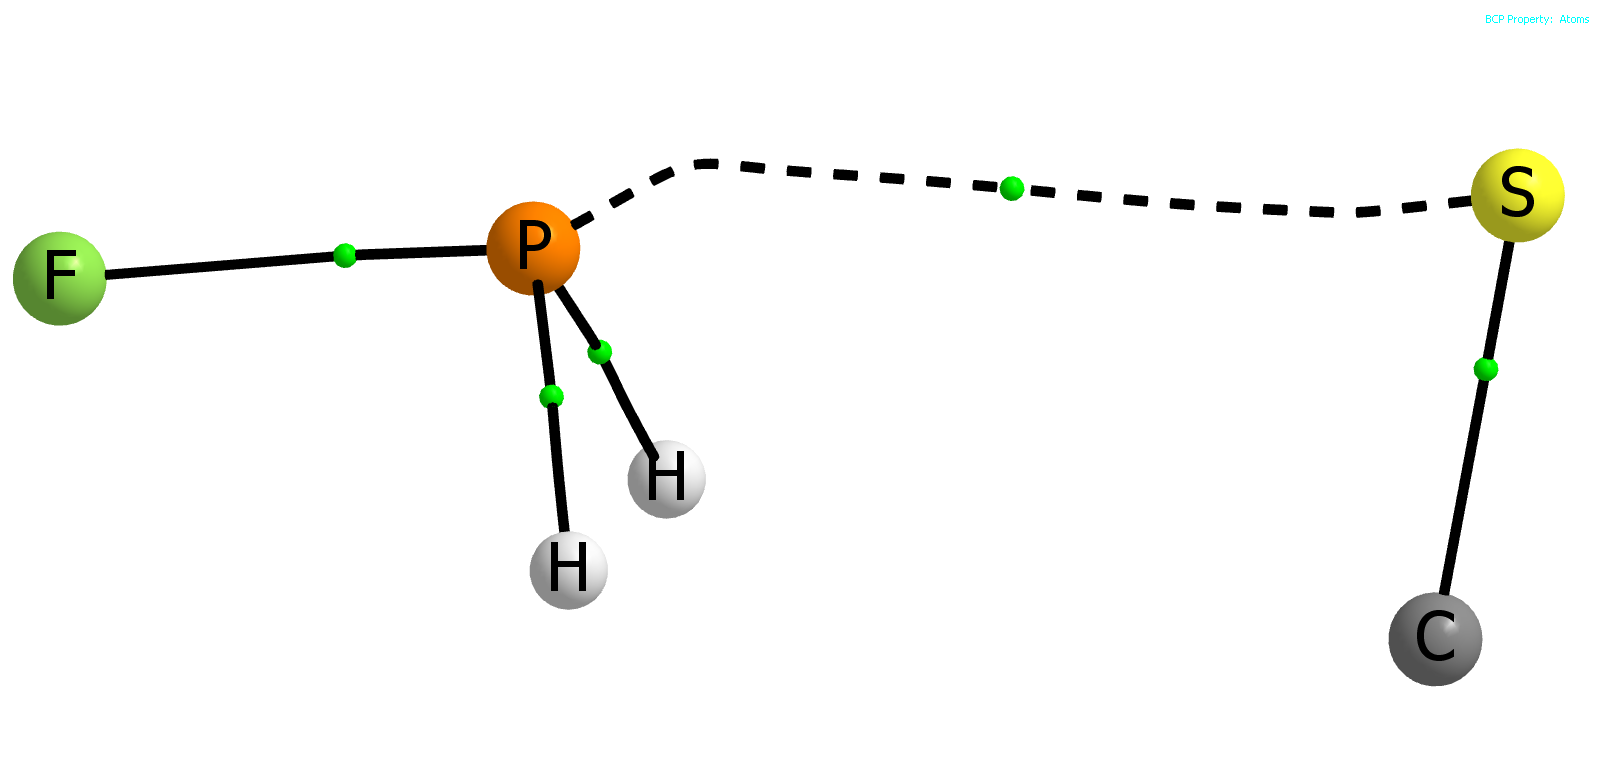 | cs:ph2f MP2= -877.49127161 NIMAG= 0  P,-0.1259800265,0.9417337472,0.  F,0.2307573738,2.5236811211,0.  H,0.7618871289,0.5316807248,1.0230627903  H,0.7618871289,0.5316807248,-1.0230627903  S,-0.8353596552,-2.3520480936,0.  C,0.7074826872,-2.2761319294,0. |
| --- | --- |
| 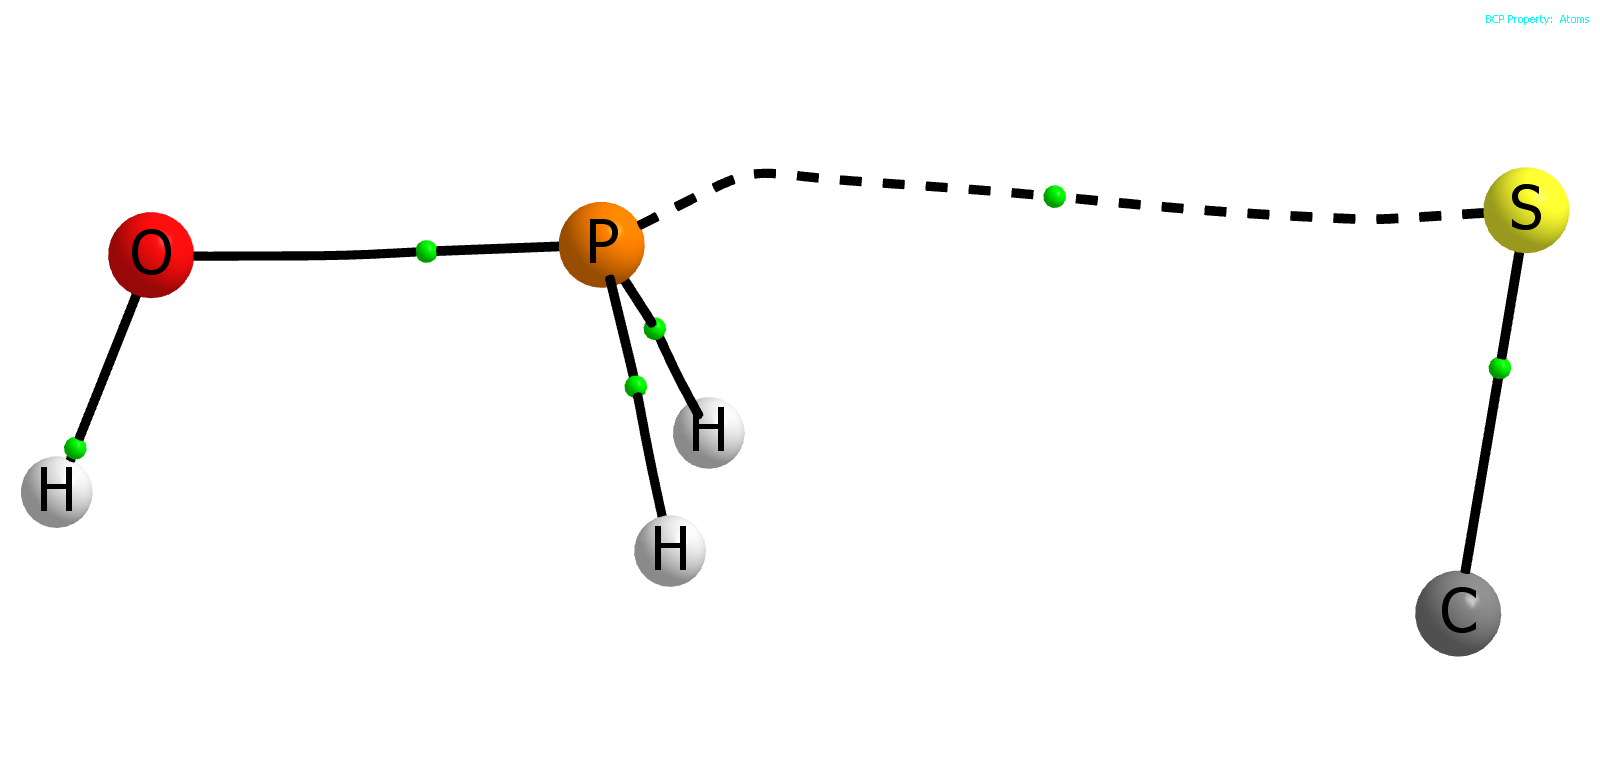 | cs:ph2(*E*-oh) MP2= -853.47277722 NIMAG= 0  P,-0.1095949349,0.9793437326,0.  O,0.2169868593,2.6109508799,0.  H,0.7539972289,0.512974217,1.0245609402  H,0.7539972289,0.512974217,-1.0245609402  S,-0.8294871163,-2.3614301823,0.  C,0.7147753713,-2.3542165692,0.  H,1.1590827286,2.8129758308,0. |
| 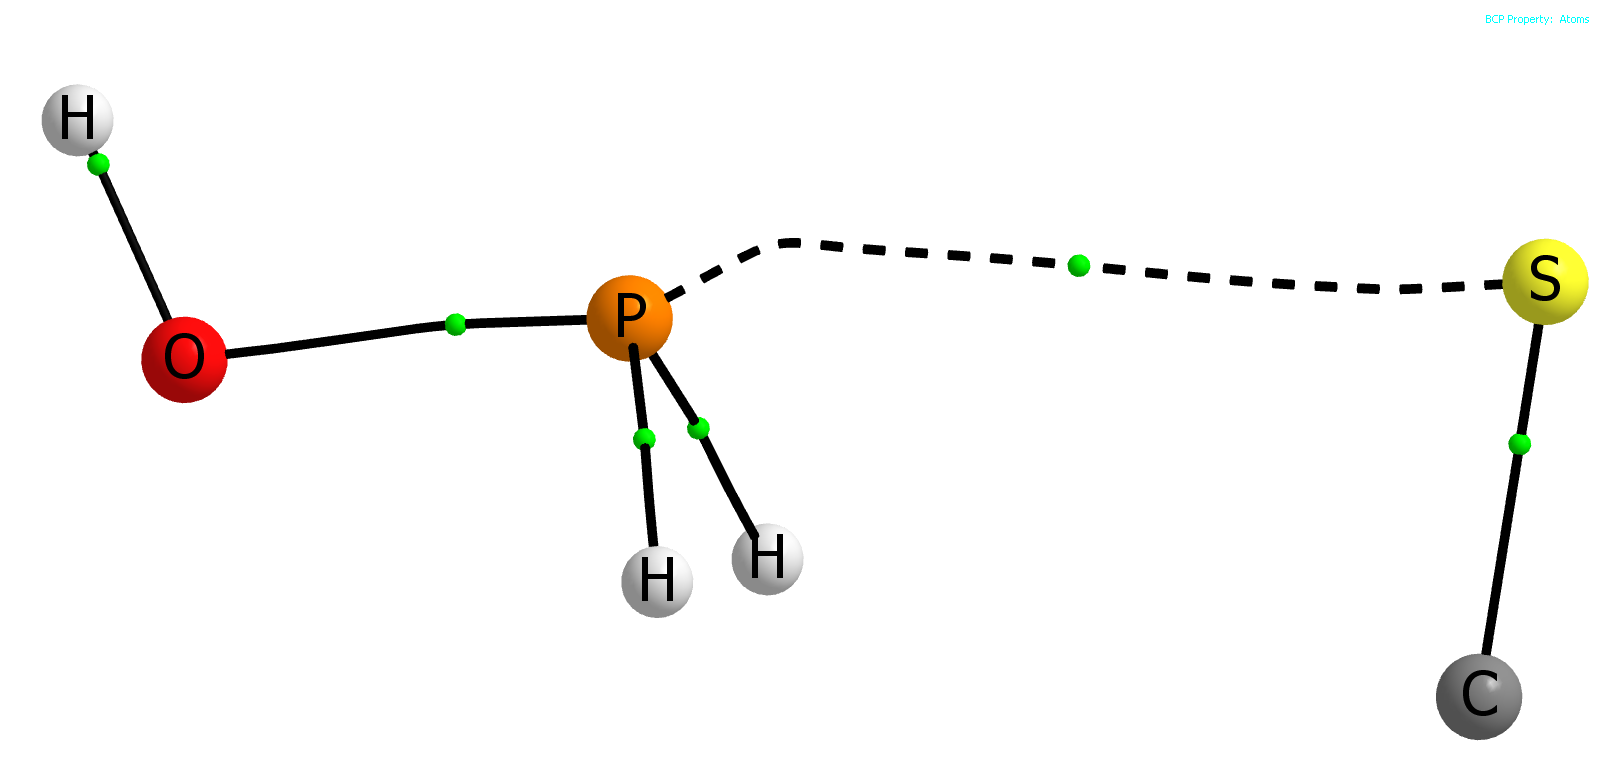 | cs:ph2(*Z*-oh) MP2= -853.47270410 NIMAG= 0  P,-0.1210587643,1.2303868701,0.  O,0.1037189217,2.8875142603,0.  H,0.7903777264,0.8883278446,1.0250620489  H,0.7903777264,0.8883278446,-1.0250620489  S,-0.4045915505,-2.1854311063,0.  C,1.1275228729,-1.9916558344,0.  H,-0.7567354025,3.318271491,0. |
| 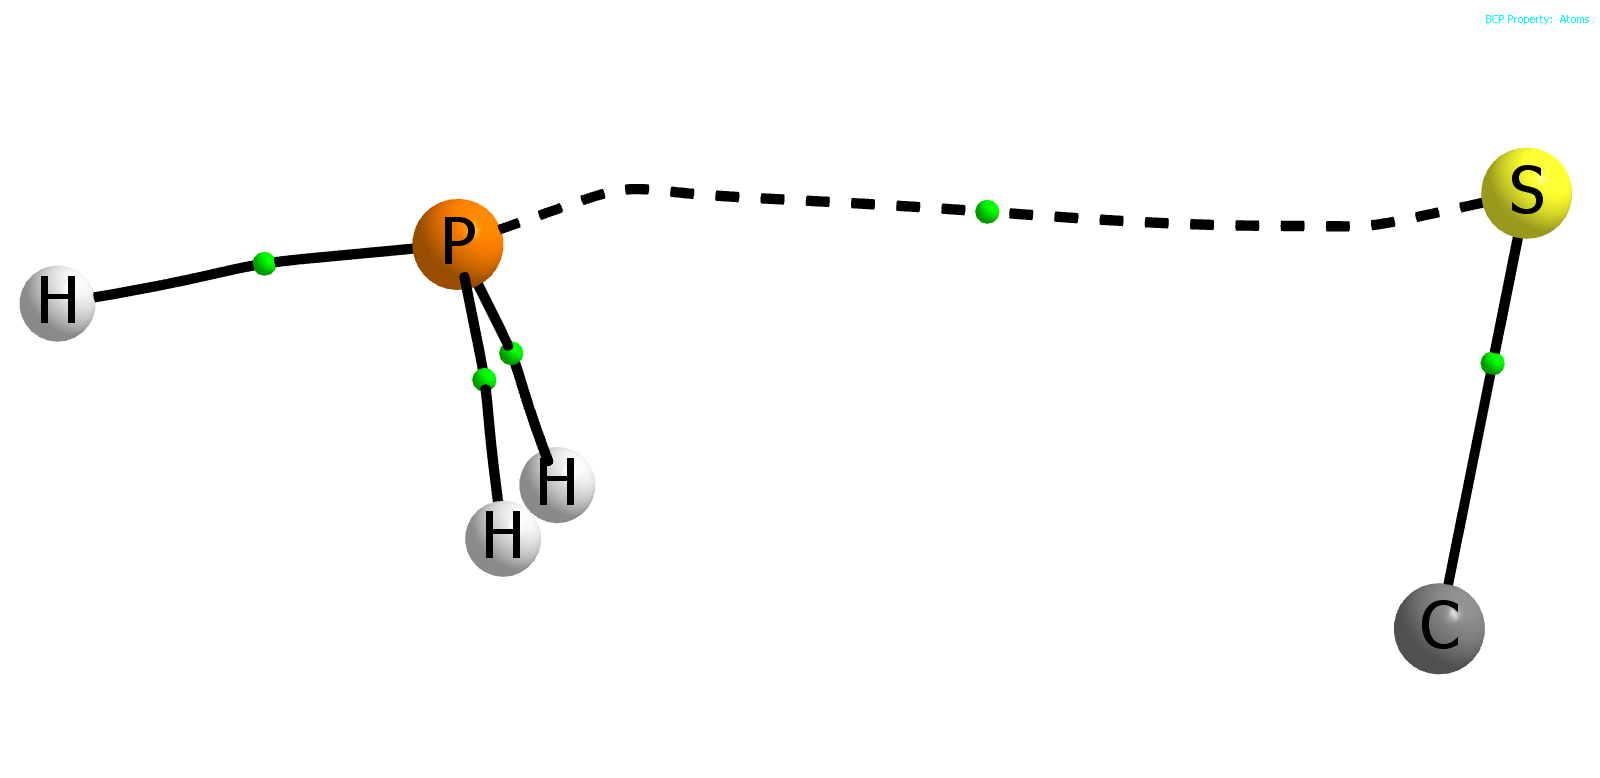 | cs:ph3 MP2= -778.32423527 NIMAG= 0  P,-0.4054369696,-0.1966786811,-2.1993451009  H,0.091173214,1.1184941184,-2.0694866724  H,0.8298909198,-0.7978381678,-1.8752238094  H,-0.1887595359,-0.2522320684,-3.5941225877  S,-0.5832252637,-0.100344089,1.5510796287  C,0.8663586353,0.3185988877,1.2277865418 |

Fig. S1. Binding energies and charge-transfer energies (kJ mol-1) versus the P-C and P-S distances for complexes CS:PH2X


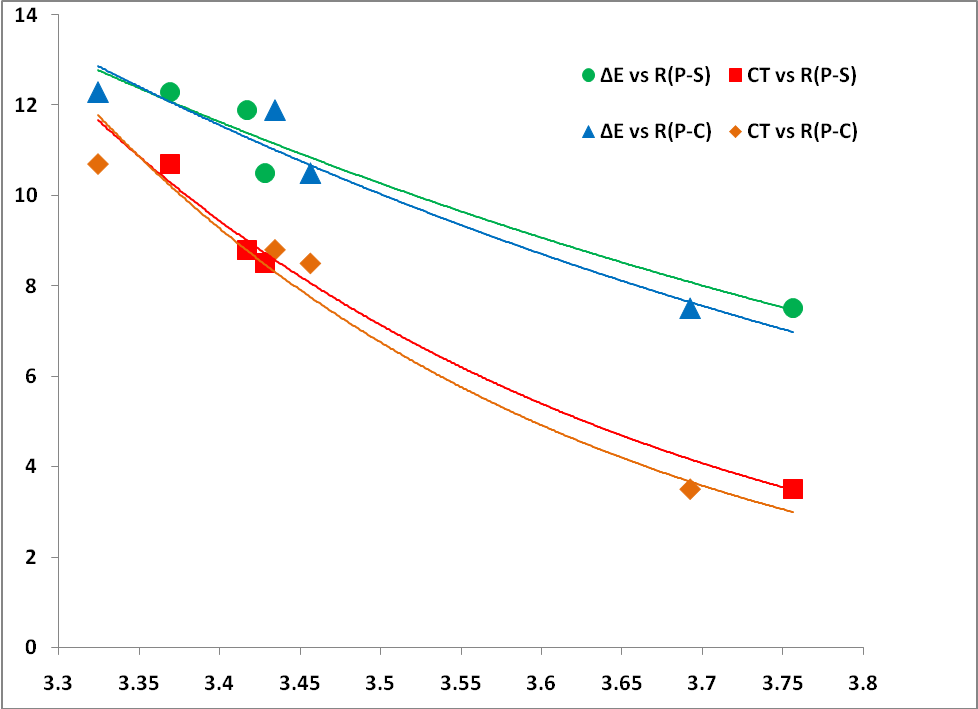


-ΔE & CT, kJ.mol–1

R(P-S) & R(P-C), Å

Table S6. Structures (Å), total energies (a.u.) and molecular graphs for complexes SC:PH2X with phosphorus-shared bonds

| 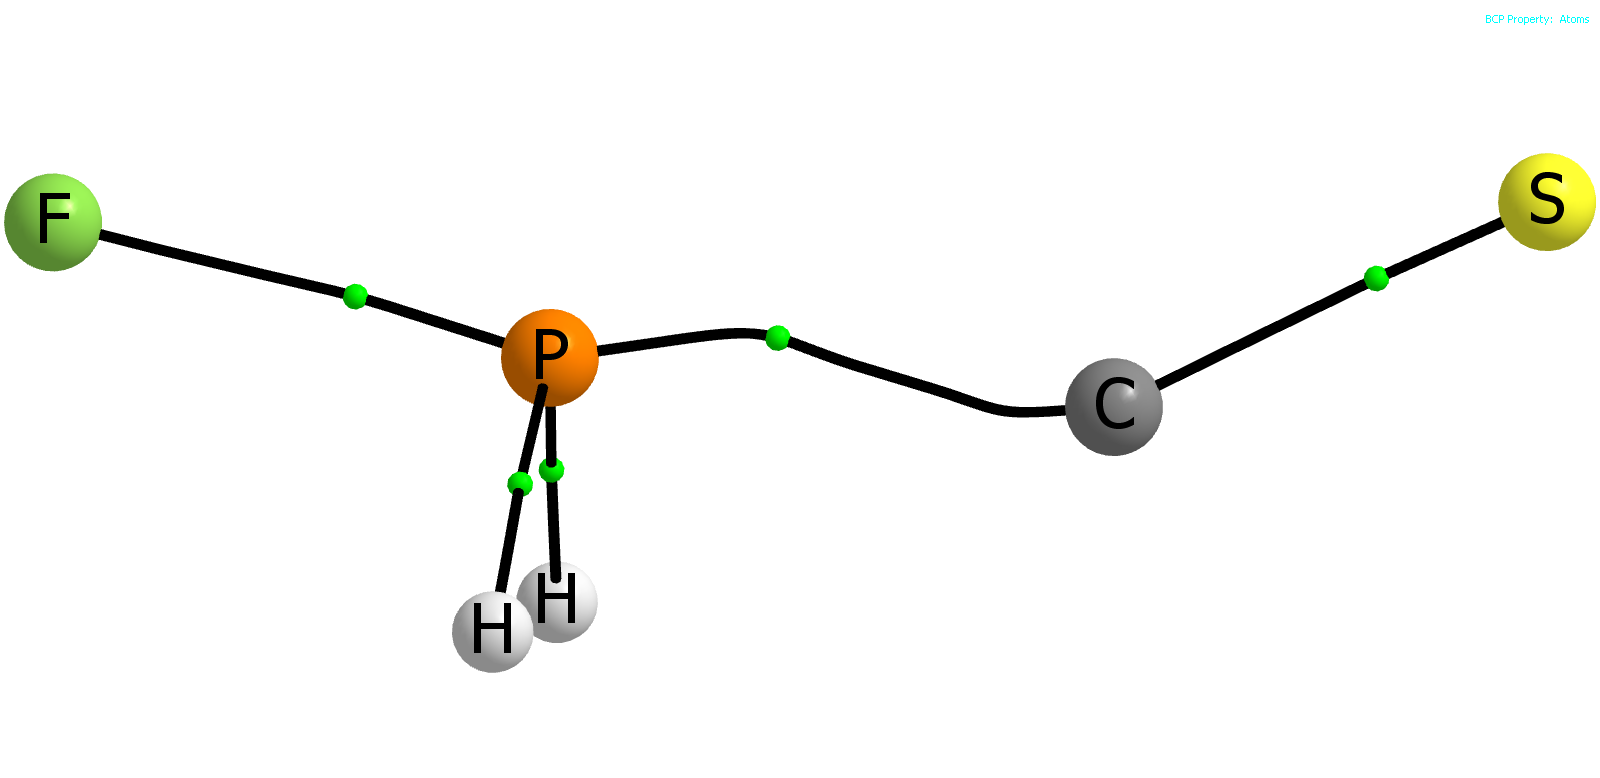 | sc:ph2f MP2= -877.50471851 NIMAG= 0  P,0.0962683419,0.4658768741,0.  H,0.9332196634,0.5746521214,1.1163194834  F,-0.3879917013,2.0655440363,0.  H,0.9332196634,0.5746521214,-1.1163194834  C,0.3075416513,-1.3609199478,0.  S,-0.3159035847,-2.7892891246,0. |
| --- | --- |
| 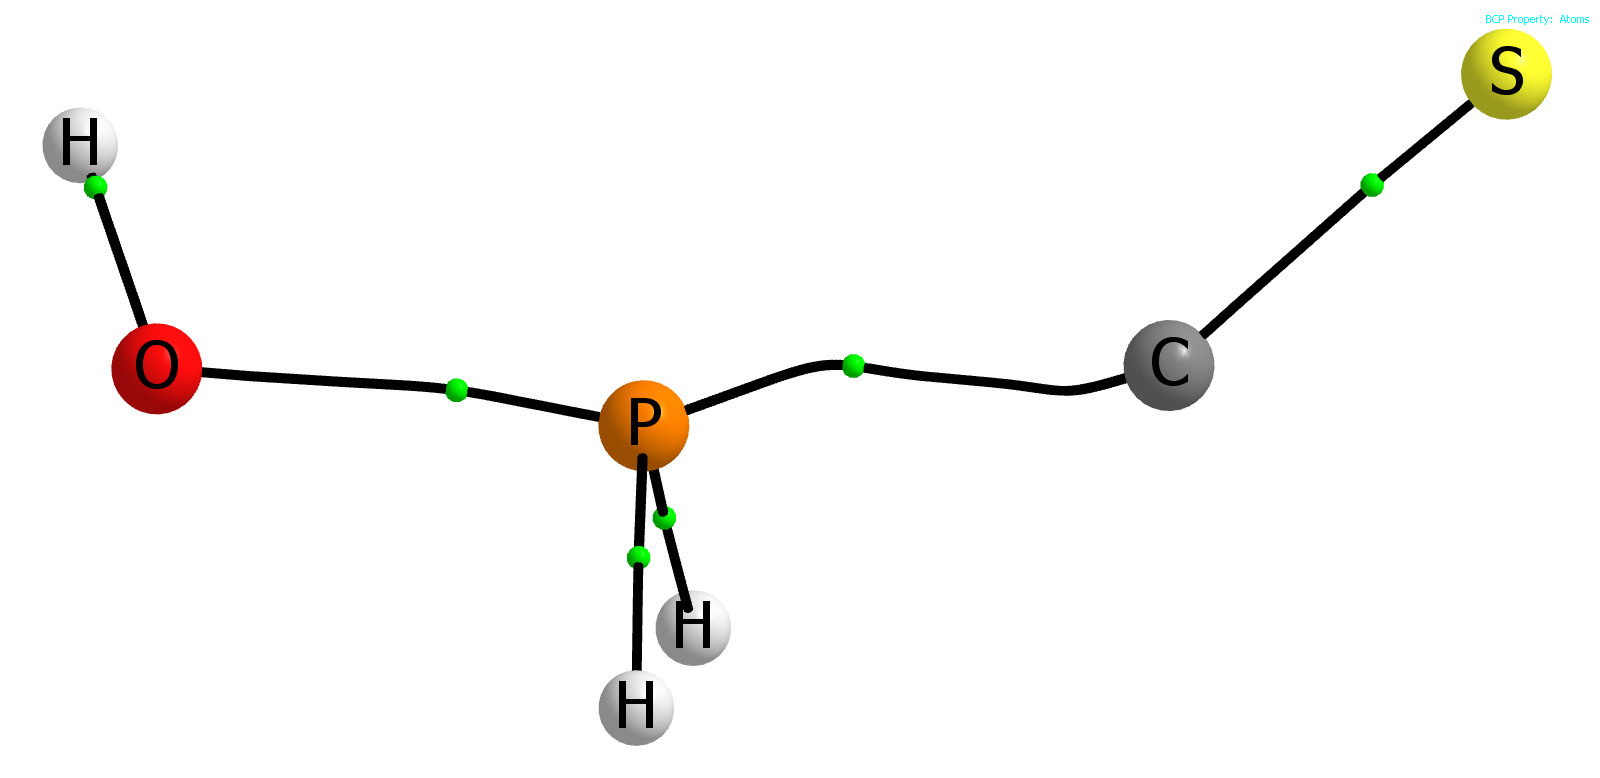 | sc:ph2(*E*-oh) MP2= -853.47761941 NIMAG= 0  P,-0.6569617733,-0.7645774218,-0.0183338578  O,-0.8702781769,-2.451538671,-0.1805247971  H,-1.3992331502,-0.5174608054,1.1468169695  H,-1.5307927074,-0.4717201778,-1.0665365883  C,-0.0028319898,0.9637478606,0.013338387  S,1.2783177926,1.8667854319,-0.022468463  H,-0.223977995,-2.9398012164,0.3457083497 |
| 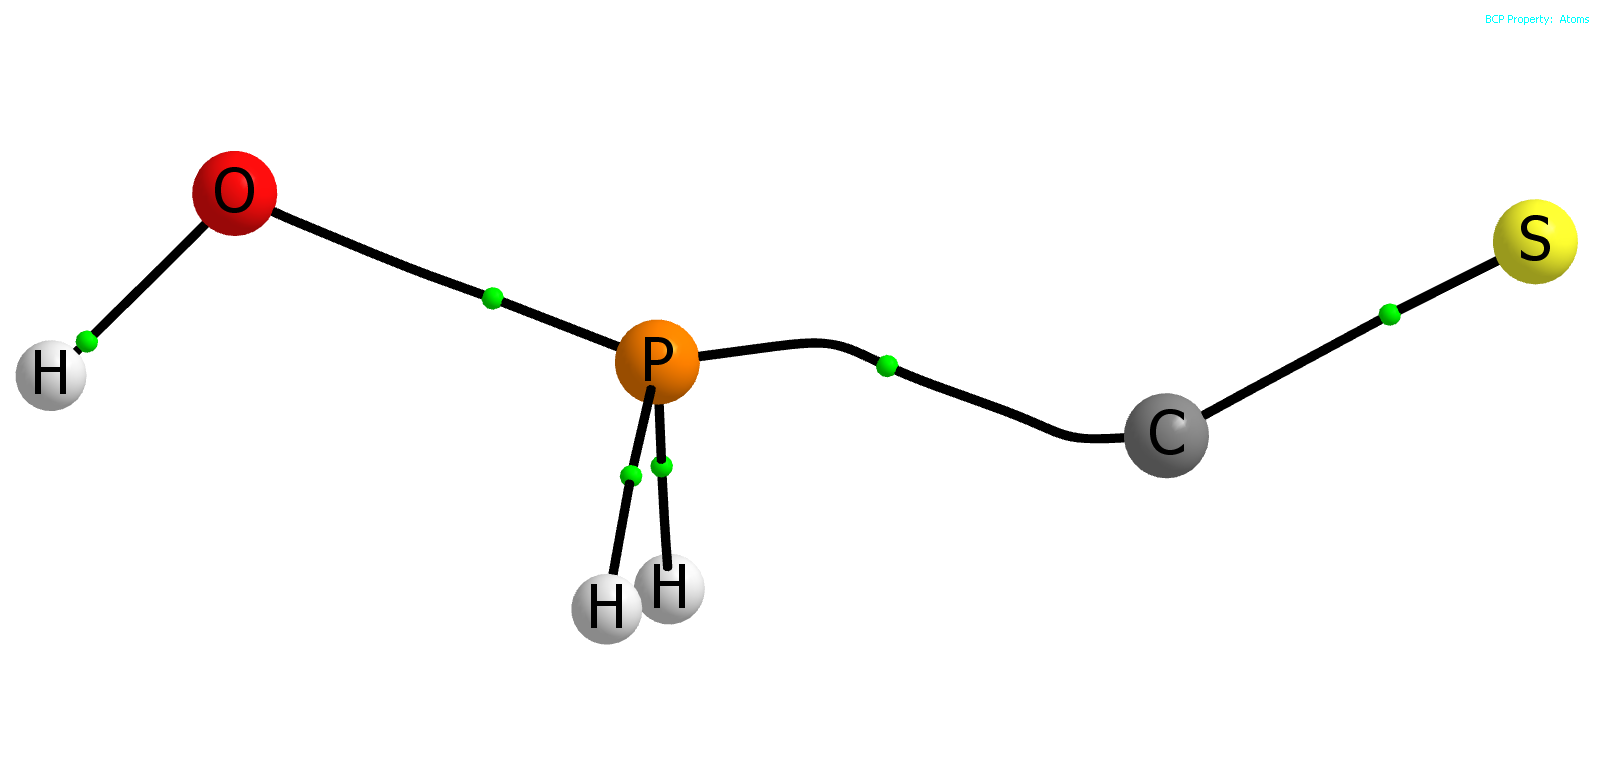 | sc:ph2(*Z*-oh) MP2= -853.47313613 NIMAG= 0  P,0.1544374709,1.0291615573,0.  O,-0.5073335069,2.5948245026,0.  H,1.0353856221,1.1238579779,1.0907491165  H,1.0353856221,1.1238579779,-1.0907491165  C,0.4698430314,-0.8686092018,0.  S,-0.2224304904,-2.2674156628,0.  H,0.1562577158,3.2993702632,0. |

Table S7. Structures (Å), total energies (a.u.) and molecular graphs for complexes SC:PH2X with traditional pnicogen bonds and SC:PH2(OH) transition structures

| 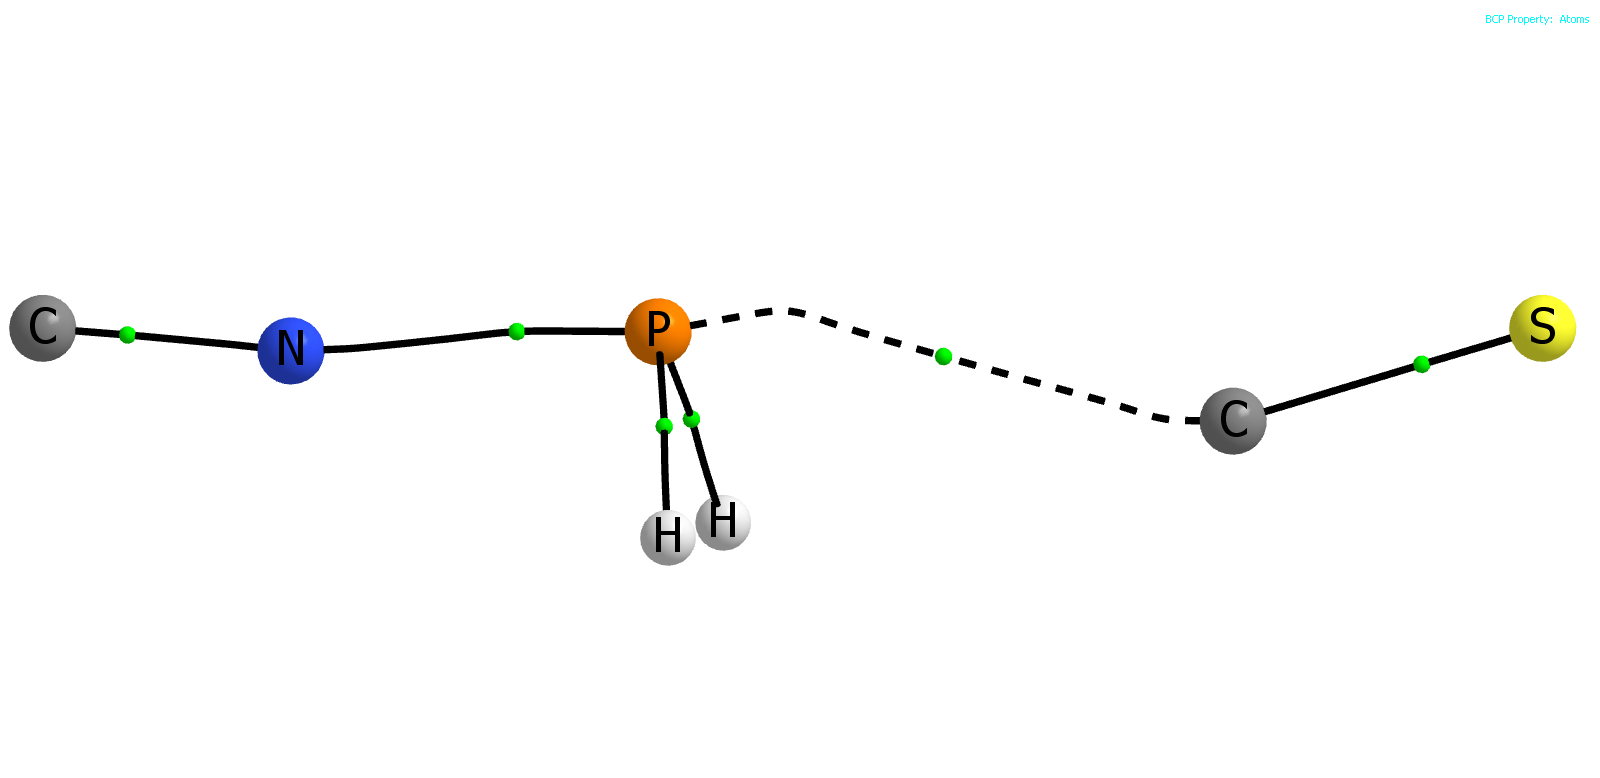 | sc:ph2nc MP2= -870.38848476 NIMAG= 0  P,-0.0920715124,-0.8196573985,0.  N,0.0318335713,-2.5646974969,0.  H,0.8416637753,-0.6273292664,-1.0350788109  H,0.8416637753,-0.6273292664,1.0350788109  C,0.2775264917,1.9216052389,0.  S,-0.1888690745,3.3871868058,0.  C,-0.0523658191,-3.7464179137,0. |
| --- | --- |
| 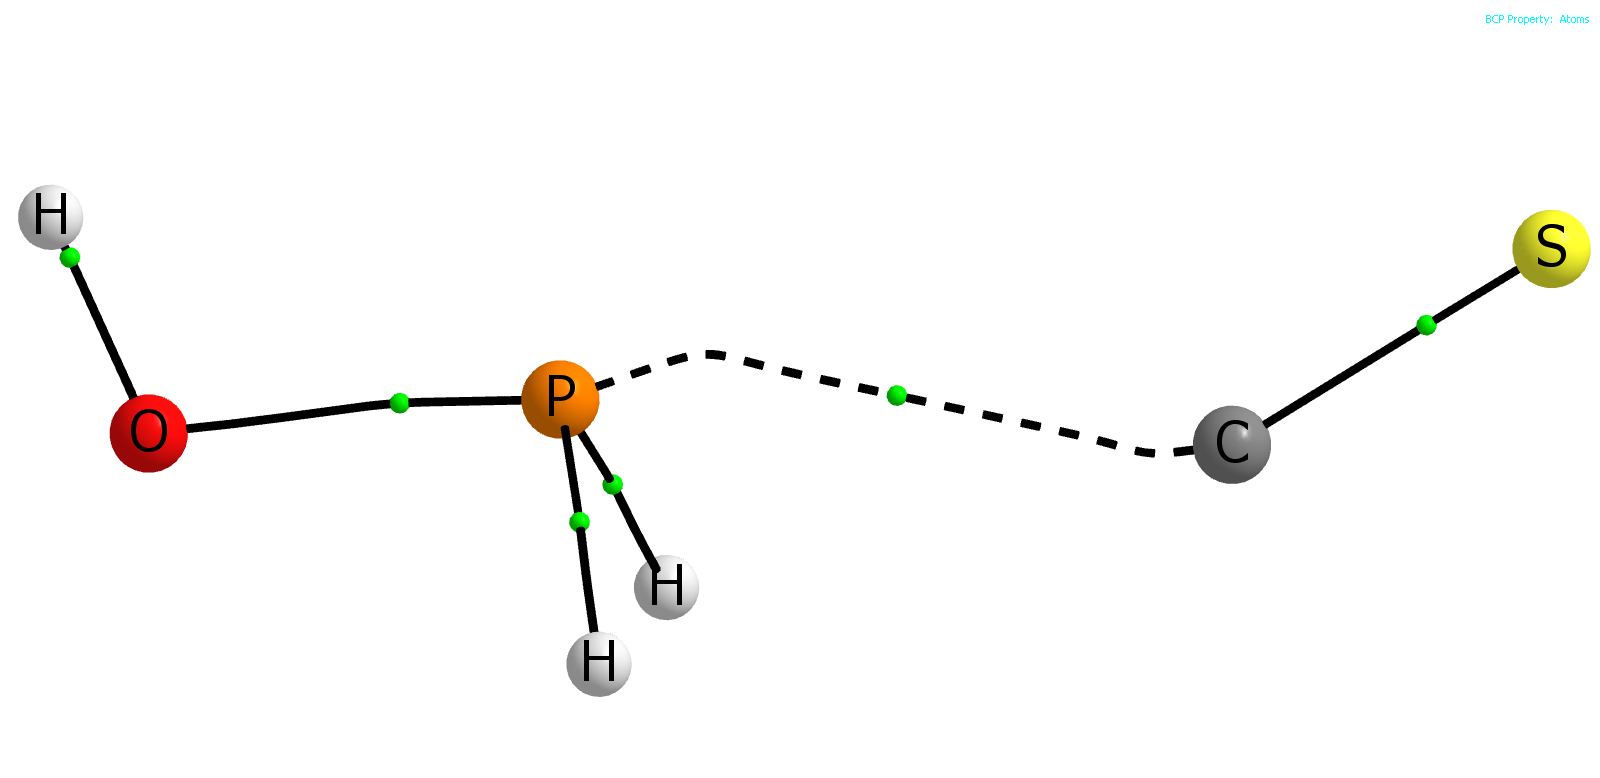 | sc:ph2(*E*-oh) MP2= -853.47525180 NIMAG= 0  P,-0.0402554296,0.8900369416,0.  O,-0.0405508867,2.5752265975,0.  H,0.9039357827,0.6911317457,1.0292272186  H,0.9039357827,0.6911317457,-1.0292272186  C,0.3702802407,-1.8179548998,0.  S,-0.3178162377,-3.1974793372,0.  H,-0.9520130762,2.8825798857,0. |
| 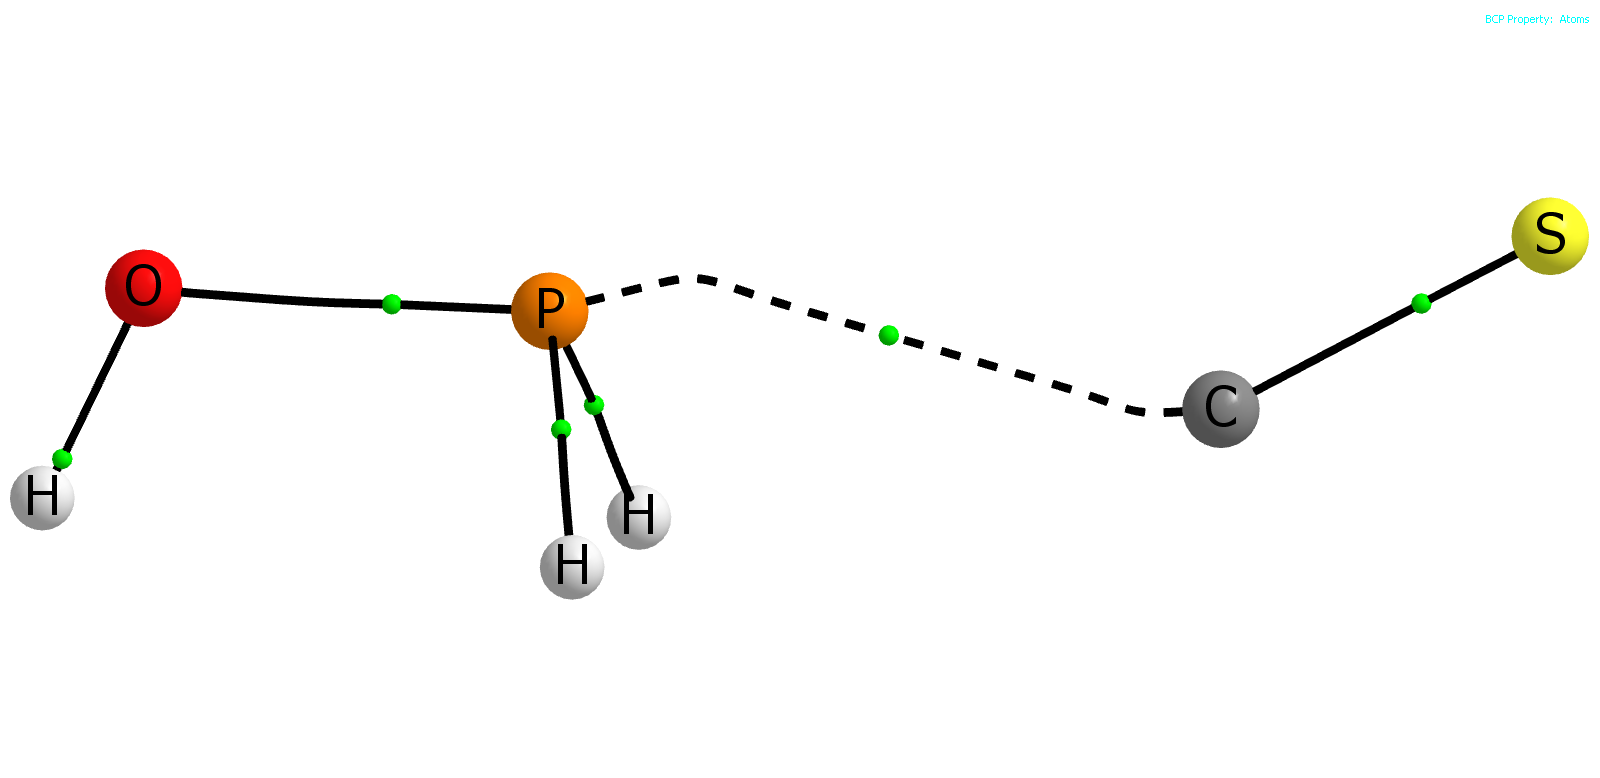 | sc:ph2(*Z*-oh) MP2= -853.47472878 NIMAG= 0  P,0.0056510185,0.9010618886,0.  O,-0.0615075603,2.5755654218,0.  H,0.9517298127,0.6686343726,1.0281691496  H,0.9517298127,0.6686343726,-1.0281691496  C,0.3639478884,-1.8672830972,0.  S,-0.3682956511,-3.2233886256,0.  H,0.8072086315,2.9915036335,0. |
| 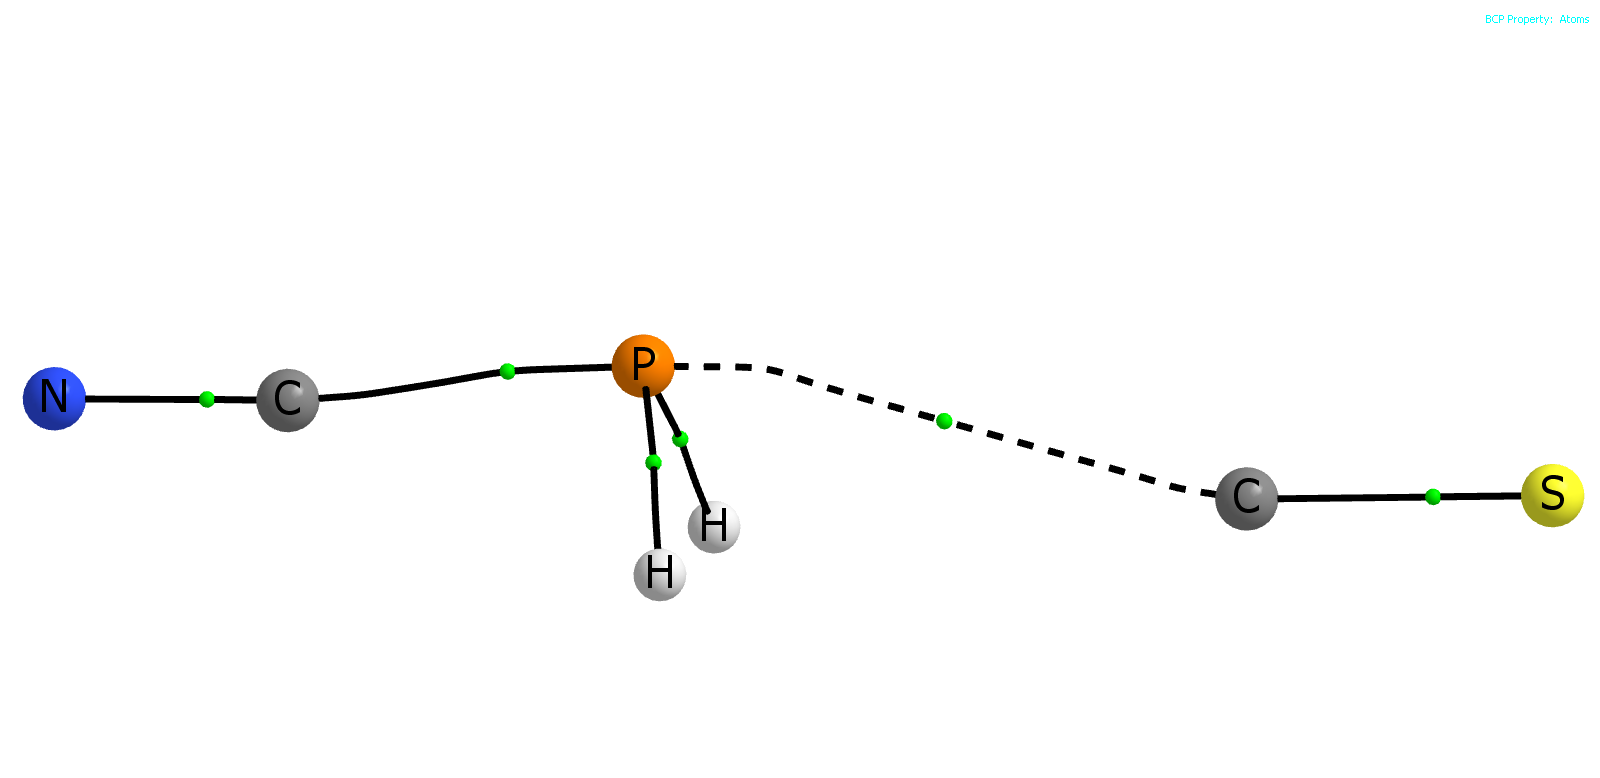 | sc:ph2cn MP2= -870.41637041 NIMAG= 0  P,-0.2270512862,-0.9422012623,0.  C,0.0888745771,-2.7142987172,0.  H,0.6827369923,-0.6627775058,-1.0375045828  H,0.6827369923,-0.6627775058,1.0375045828  C,0.1957179349,2.1298025749,0.  S,0.0557296935,3.6633084736,0.  N,0.1739487262,-3.8864456286,0. |
| 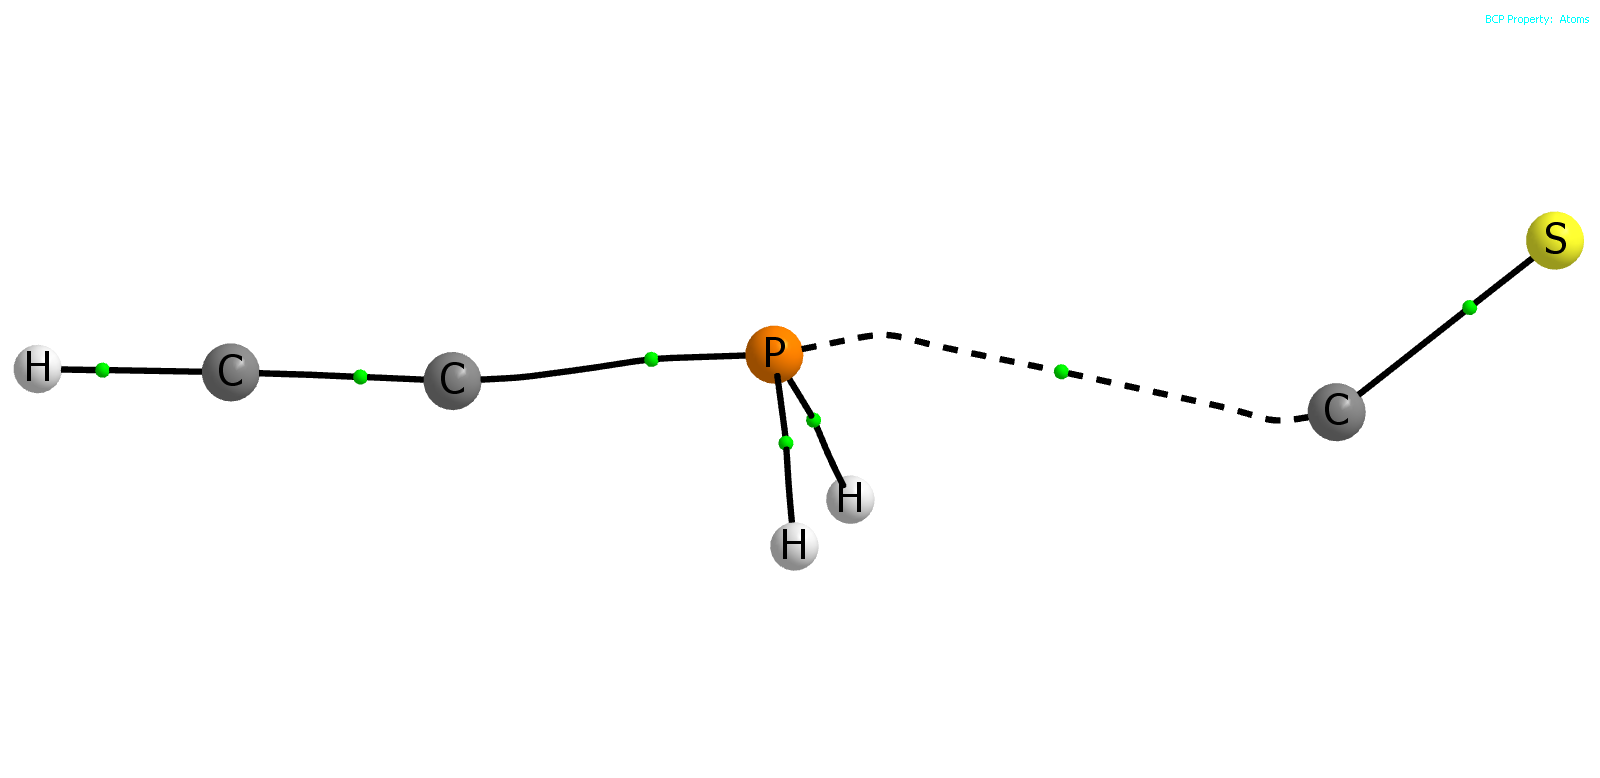 | sc:ph2cch MP2= -854.31753190 NIMAG= 0  P,-0.0079538,-1.0684328,0.  C,-0.02855226,-2.84959474,0.  H,0.93565675,-0.90760425,-1.036031  H,0.93565675,-0.90760425,1.036031  C,0.5934714,1.98077319,0.  S,-0.23120021,3.28339201,0.  C,-0.18909012,-4.06056445,0.  H,-0.30597829,-5.11749487,0. |
| 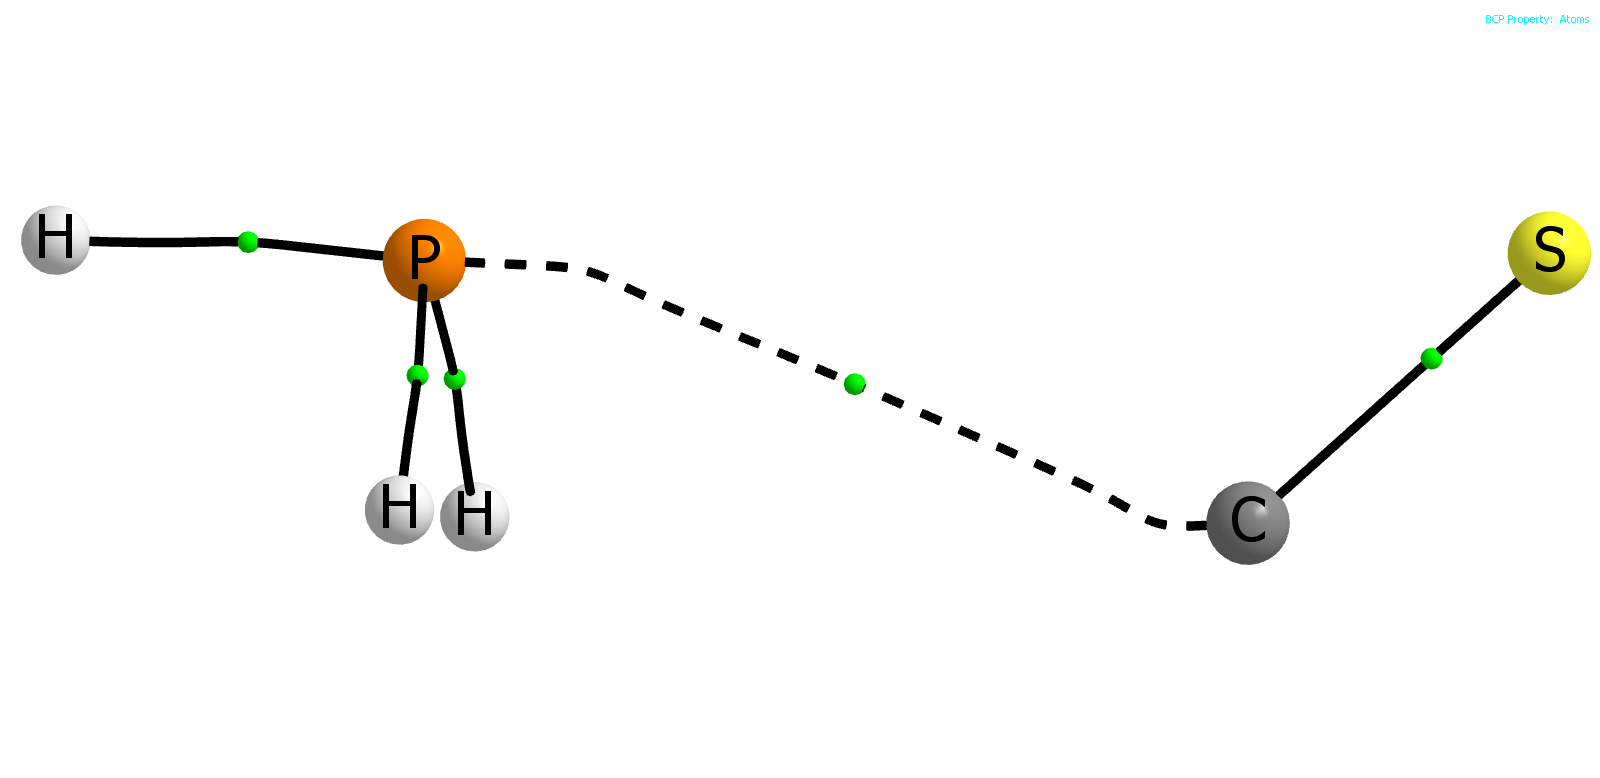 | sc:ph3 MP2= -778.32442837 NIMAG= 0  P,-0.1396641611,-0.9430872863,0.  H,-0.2096881711,-2.356014867,0.  H,0.8199802071,-0.8878961698,-1.0324173028  H,0.8199802071,-0.8878961698,1.0324173028  C,0.8408461976,2.2197423797,0.  S,-0.1893884766,3.3677678059,0. |
| 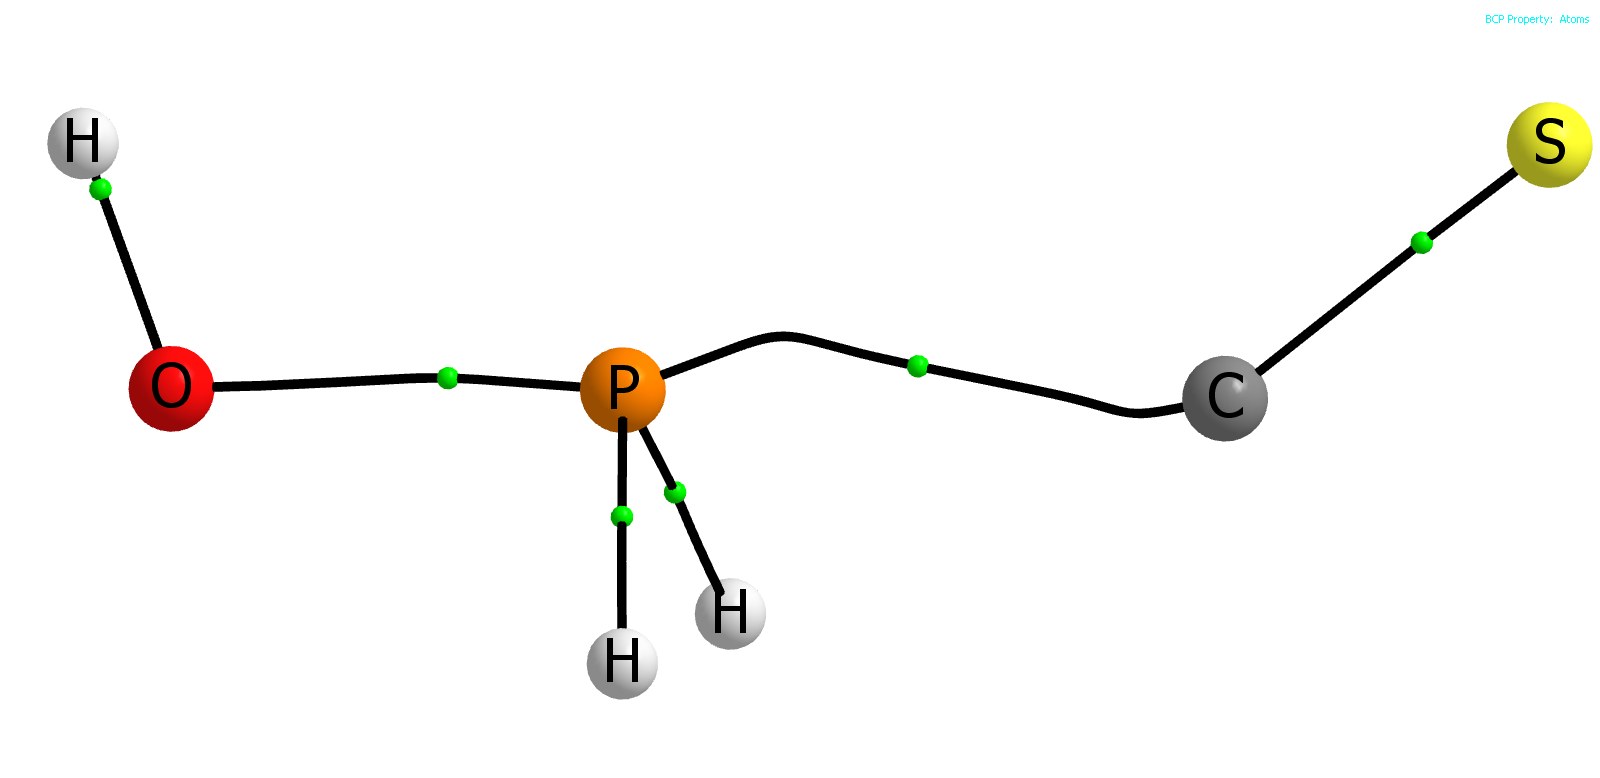 | sc:ph2(*E*-oh) ts MP2= -853.47436332 NIMAG= 1  P,-1.1604542308,-0.073500814,0.  O,-2.8303131453,0.2267754689,0.  H,-1.1379003319,-1.0130380047,1.0473145267  H,-1.1379003319,-1.0130380047,-1.0473145267  C,1.0619737169,-0.4985379055,0.  S,2.4378759161,0.2111357412,0.  H,-2.9827453628,1.1771295588,0. |
| 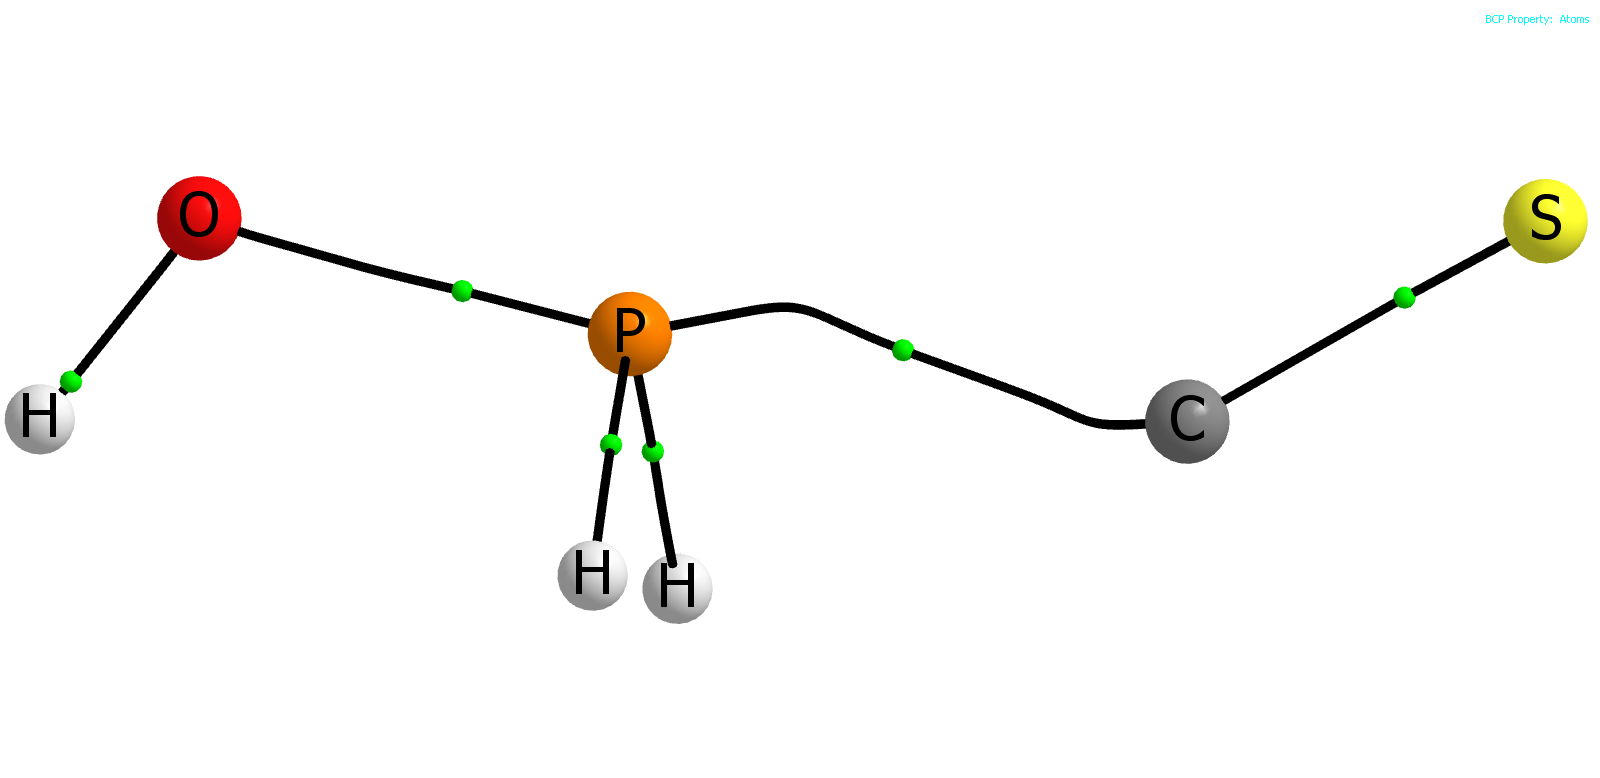 | sc:ph2(*Z*-oh) ts MP2= -853.47261456 NIMAG= 1  P,0.1571178014,0.6524907784,0.  O,-0.18254433,2.309994018,0.  H,1.0861511316,0.5763377713,1.059  H,1.0851641252,0.5765019418,-1.059  C,0.3639088779,-1.4791168882,0.  S,-0.4645352367,-2.7900973291,0.  H,0.6052015829,2.8686176741,0. |

Table S8. Electron density properties at intermolecular BCPs (au) in CS:PH2X and SC:PH2X complexes

| OC:PH2X | ρBCP | 2ρBCP | HBCP |
| --- | --- | --- | --- |
| X = F | 0.0156 | 0.0446 | 0.0003 |
| NC | 0.0107 | 0.0344 | 0.0011 |
| OH-*E* | 0.0106 | 0.0345 | 0.0011 |
| OH-*Z* | 0.0104 | 0.0342 | 0.0011 |
| CN | 0.0076 | 0.0259 | 0.0012 |
| CCH | 0.0069 | 0.0236 | 0.0012 |
| H | 0.0054 | 0.0176 | 0.0010 |
| SC:PH2X (Shared) |  |  |  |
| X= F | 0.1390 | –0.1234 | –0.1301 |
| OH-*E* | 0.1396 | –0.1789 | –0.1288 |
| OH-*Z* | 0.1224 | –0.1533 | –0.0909 |
| SC:PH2X (Traditional) |  |  |  |
| NC | 0.0228 | 0.0482 | –0.0016 |
| OH-*E* | 0.0239 | 0.0485 | –0.0020 |
| OH-*Z* | 0.0215 | 0.0470 | –0.0013 |
| CN | 0.0122 | 0.0348 | 0.0008 |
| CCH | 0.0119 | 0.0322 | 0.0007 |
| H | 0.0080 | 0.0233 | 0.0009 |
| SC:PH2X (TS) |  |  |  |
| OH-*E* | 0.0630 | 0.0304 | –0.0211 |
| OH-*Z* | 0.0803 | –0.0013 | –0.0346 |

Fig. S2. Evolution of the electron density properties at intermolecular P-C BCPs of OC:PH2X and SC:PH2X as a function of the P-C distance.

Table S9. Components of spin-spin coupling constants 1pJ(P-C) for SC:PH2X complexes with pnicogen-shared bonds and 1J(P-C) (Hz) for (H2PCS)+

| PH2X, X = | PSO | DSO | FC | SD | 1pJ(P-C) |
| --- | --- | --- | --- | --- | --- |
| F | –14.0 | 0.2 | –82.7 | 7.8 | –88.6 |
| OH-*E* | –12.3 | 0.2 | –143.3 | 7.5 | –147.8 |
| OH-*Z* | –9.3 | 0.2 | –91.2 | 7.4 | –92.8 |
|  | PSO | DSO | FC | SD | 1J(P-C) |
| (H2PCS)+ | –17.1 | 0.2 | –78.0 | –1.8 | –96.7 |
